# Supplementary material for: Redox Metabolism and Vascular Calcification in Chronic Kidney Disease
Source: MDPI journal article supplement (doi:10.3390/biom13091419), 2023-09-20
Supplement: s1 [file s1]

## Redox metabolism and vascular calcification in Chronic-Kidney Disease

**A**

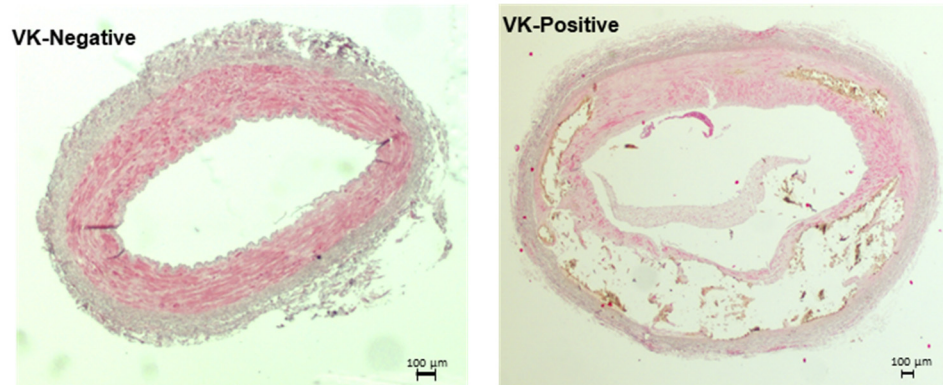

**B**

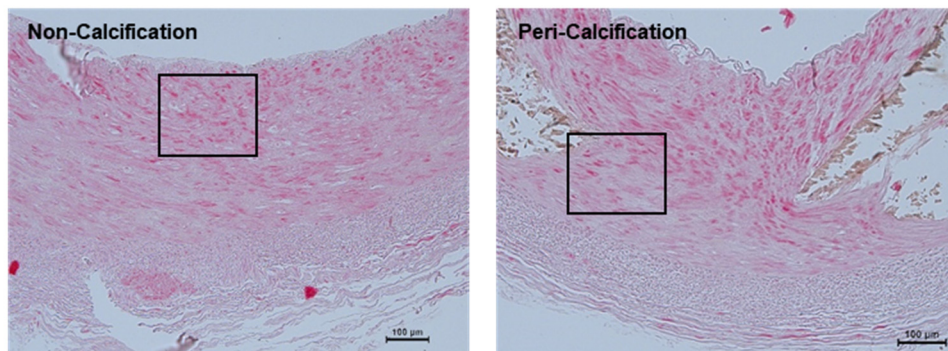

**Supplementary Figure S1:** Representative images of von Kossa staining. (A) Epigastric arteria negative and positive for von kossa staining. (B) Micrographies of distant and peri-calcification areas of the same epigastric ar-teria section for Von Kossa staining.

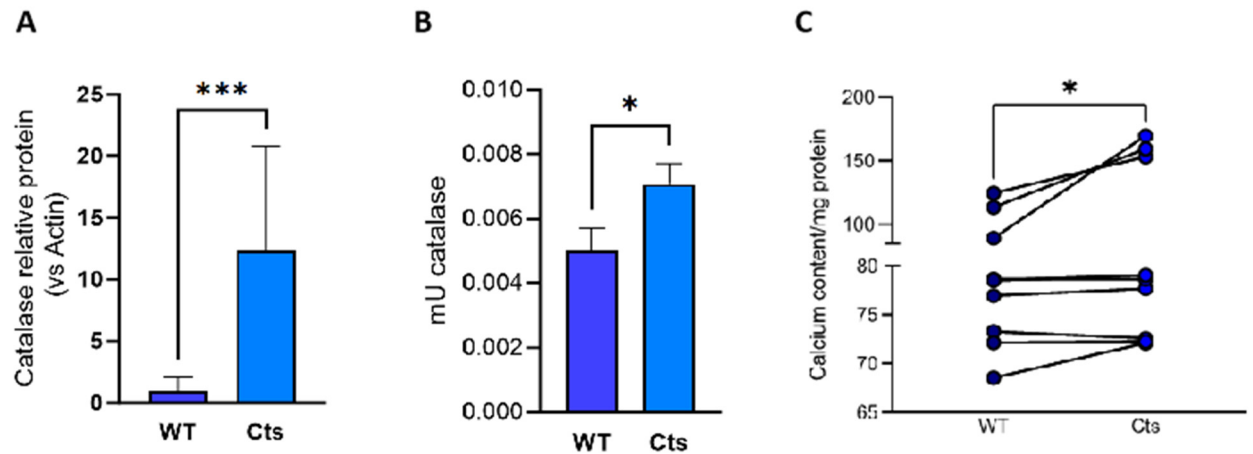

**Supplementary Figure S2:** VSMCs from Wild-type (WT) and Catalase (Cts) cell culture. (A) Relative optical density of western-blot data for catalase protein expression. (B) Cts activity in VSMC cell culture. (C) Calcium content per mg of protein in WT cell culture and Cts overexpressing cells. \* =  $p$ -value < 0.05; \*\*\* =  $p$ -value < 0.001. (Pools of primary VSMCs were obtained from N=5 wt and N=5 overexpressing catalase mice, 2 independent experiments with 3 replicates were analysed).

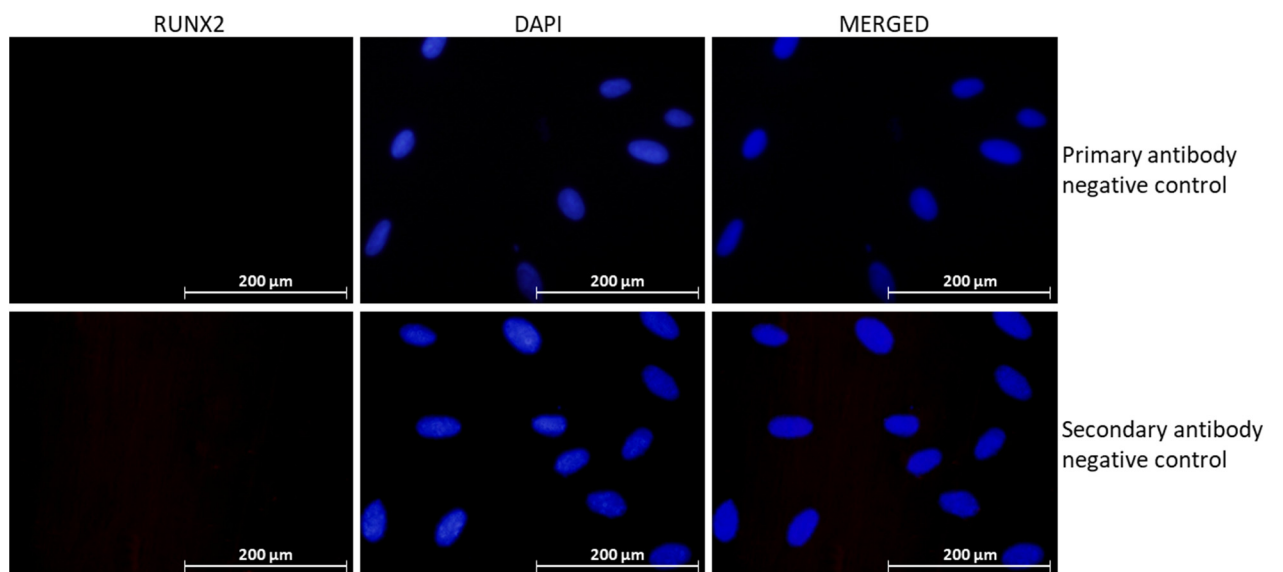

**Supplementary Figure S3.** Immunofluorescence of RUNX2 in VSMCs. Negative controls for primary (rabbit anti-RUNX2) and secondary antibody (anti-rabbit Alexa Fluor 594). DAPI is used as nuclear counter-staining.

**Supplementary Table S1:** Biochemical parameters of sham-operated rats with normal renal function without vascular calcification (No-VC) and nephrectomised rats fed a high phosphorus (HPD) with vascular calcification (VC) diet at 20 weeks.

|                           | No-VC (N = 3) |       |             | VC (N = 3) |       |               | p-value |
|---------------------------|---------------|-------|-------------|------------|-------|---------------|---------|
|                           | Mean          | SD    | 95%CI       | Mean       | SD    | 95%CI         |         |
| <b>Creatinine (mg/dL)</b> | 0.43          | 0.05  | 0.29-0.57   | 3.2        | 0.52  | 1.88-4.51     | 0.011   |
| <b>Urea (mg/dL)</b>       | 39            | 13.07 | 6.52-71.48  | 262        | 39.66 | 163.48-360-52 | 0.001   |
| <b>Albumin (mg/dL)</b>    | 46.9          | 1.75  | 42.54-51.25 | 29.46      | 2.77  | 22.56-36.37   | 0.001   |
| <b>Phosphorus (mg/dL)</b> | 5.06          | 1.19  | 2.10-8.03   | 15.16      | 2.22  | 9.64-20.69    | 0.002   |
| <b>Calcium (mg/dL)</b>    | 11.8          | 0.79  | 9.82-13.77  | 10.9       | 0.10  | 10.65-11.14   | 0.187   |

SD: standard deviation; CI: confidence interval

**Supplementary Table S2.** Summary of the peptides identified by LC-MS/MS. More detailed information can be found in the annexe.

| Spot<br>Nº | MASCOT<br>Symbol | Peptide sequence | Observed<br>m/z | Ion<br>charge | Mr(expt)  | Mr(calc)  | Delta   | Score | Matches | RMS error<br>(ppm) |
|------------|------------------|------------------|-----------------|---------------|-----------|-----------|---------|-------|---------|--------------------|
| 1          | CAH3             | GGPLSGPYR        | 452.4518        | 2+            | 902.8890  | 902.4610  | 0.4279  | 50    | 15/64   | 399                |
|            |                  | VVFDDTFDR        | 557.5192        | 2+            | 1113.0239 | 1112.5139 | 0.5100  | 43    | 20/72   | 216                |
|            |                  | EPMTVSSDQMAK     | 678.4788        | 2+            | 1354.9431 | 1354.5745 | 0.3686  | 53    | 53/200  | 472                |
| 2          | GPX3             | QEPGENSEILPSLK   | 770.9166        | 2+            | 1539.8186 | 1540.7620 | -0.9434 | 57    | 31/150  | 1123               |
|            |                  | NSCPPTAELLGSPGR  | 778.4015        | 2+            | 1554.7885 | 1554.7460 | 0.0424  | 68    | 21/160  | 1341               |
| 3          | GSTM2            | LYSEFLGK         | 478.9332        | 2+            | 955.8518  | 955.5015  | 0.3503  | 32    | 10/58   | 794                |
|            |                  | ITQSNAILR        | 508.4895        | 2+            | 1014.9644 | 1014.5822 | 0.3822  | 65    | 22/80   | 570                |
|            |                  | CLDAFPNLK        | 539.4450        | 2+            | 1076.8755 | 1076.5325 | 0.3430  | 37    | 22/68   | 950                |
|            |                  | YSMGDAPDYDR      | 653.3469        | 2+            | 1304.6793 | 1304.4979 | 0.1814  | 58    | 17/140  | 1019               |
|            |                  | VDVLENQAMDTR     | 703.9233        | 2+            | 1405.8321 | 1405.6507 | 0.1814  | 78    | 41/184  | 558                |
|            |                  | LFLEYTDTSYEDK    | 812.3617        | 2+            | 1622.7088 | 1622.7352 | -0.0264 | 63    | 13/112  | 305                |
|            |                  | LFLEYTDTSYEDKK   | 876.3865        | 2+            | 1750.7584 | 1750.8301 | -0.0717 | 68    | 21/122  | 780                |
| 4          | SODM             | GELLEAIKR        | 514.9566        | 2+            | 1027.8986 | 1027.6026 | 0.2961  | 51    | 20/72   | 1109               |
|            |                  | GDVTTQVALQPALK   | 720.9116        | 2+            | 1439.8087 | 1439.7984 | 0.0103  | 93    | 20/126  | 936                |
| 5          | TKT              | LAVSQVPR         | 435.4305        | 2+            | 868.8465  | 868.5130  | 0.3335  | 40    | 12/62   | 291                |
|            |                  | HQPTAIIAK        | 489.9728        | 2+            | 977.9310  | 977.5658  | 0.3652  | 29    | 17/78   | 1219               |

MASCOT search parameters; Database: SwissProt 2022\_04 (accessed 12/14/2022), Taxonomy: Rattus (8,180 sequences), Enzyme: Trypsin, Max missed cleavages: 1, Fixed modifications: Carbamidomethyl (C), Variable modifications: Deaminated (NQ) and Oxidation (M), Peptide mass tolerance: 1.2 Da, Fragment mass tolerance: 0.6 Da, Instrument: ESI-TRAP.

## ANNEXE

MS/MS Fragmentation of **GGPLSGPYR** found in **CAH3**

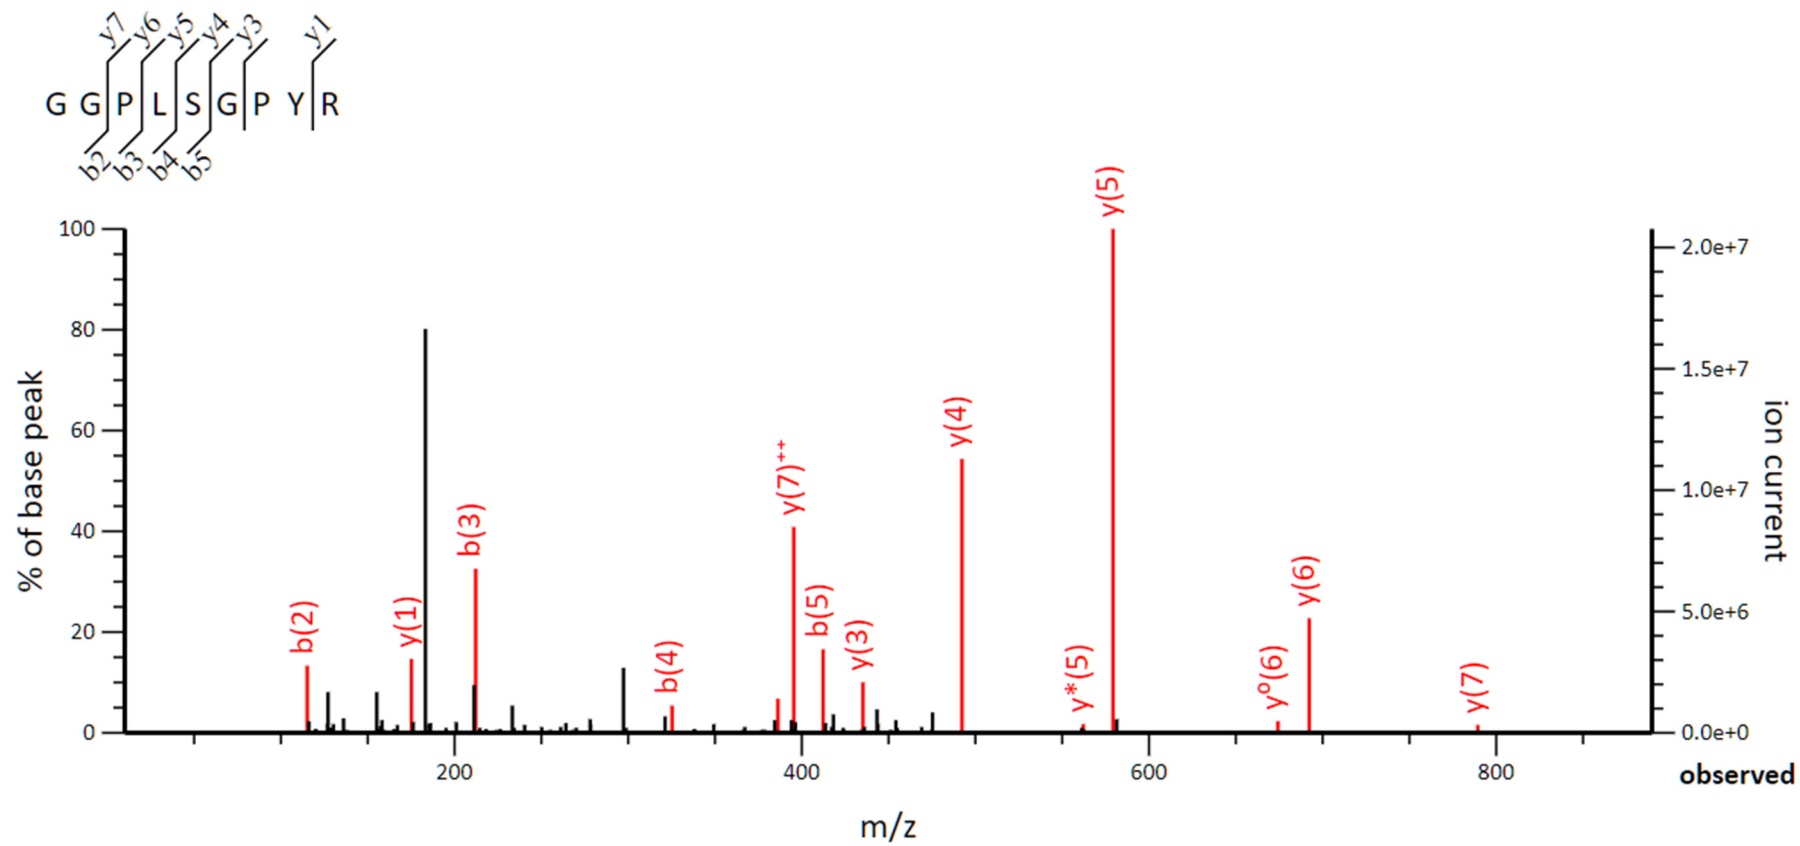

**Monoisotopic mass of neutral peptide Mr(calc):** 902.4610

**Ions Score:** 50 **Expect:** 0.00024

**Matches:** 15/64 fragment ions using 19 most intense peaks

| # | b        | b <sup>++</sup> | b <sup>0</sup> | b <sup>0++</sup> | Seq. | y        | y <sup>++</sup> | y <sup>*</sup> | y <sup>*++</sup> | y <sup>0</sup> | y <sup>0++</sup> | # |
|---|----------|-----------------|----------------|------------------|------|----------|-----------------|----------------|------------------|----------------|------------------|---|
| 1 | 58.0287  | 29.5180         |                |                  | G    |          |                 |                |                  |                |                  | 9 |
| 2 | 115.0502 | 58.0287         |                |                  | G    | 846.4468 | 423.7271        | 829.4203       | 415.2138         | 828.4363       | 414.7218         | 8 |
| 3 | 212.1030 | 106.5551        |                |                  | P    | 789.4254 | 395.2163        | 772.3988       | 386.7030         | 771.4148       | 386.2110         | 7 |
| 4 | 325.1870 | 163.0972        |                |                  | L    | 692.3726 | 346.6899        | 675.3461       | 338.1767         | 674.3620       | 337.6847         | 6 |
| 5 | 412.2191 | 206.6132        | 394.2085       | 197.6079         | S    | 579.2885 | 290.1479        | 562.2620       | 281.6346         | 561.2780       | 281.1426         | 5 |
| 6 | 469.2405 | 235.1239        | 451.2300       | 226.1186         | G    | 492.2565 | 246.6319        | 475.2300       | 238.1186         |                |                  | 4 |
| 7 | 566.2933 | 283.6503        | 548.2827       | 274.6450         | P    | 435.2350 | 218.1212        | 418.2085       | 209.6079         |                |                  | 3 |
| 8 | 729.3566 | 365.1819        | 711.3461       | 356.1767         | Y    | 338.1823 | 169.5948        | 321.1557       | 161.0815         |                |                  | 2 |
| 9 |          |                 |                |                  | R    | 175.1190 | 88.0631         | 158.0924       | 79.5498          |                |                  | 1 |

MS/MS Fragmentation of **VVFDDTFDR** found in **CAH3**

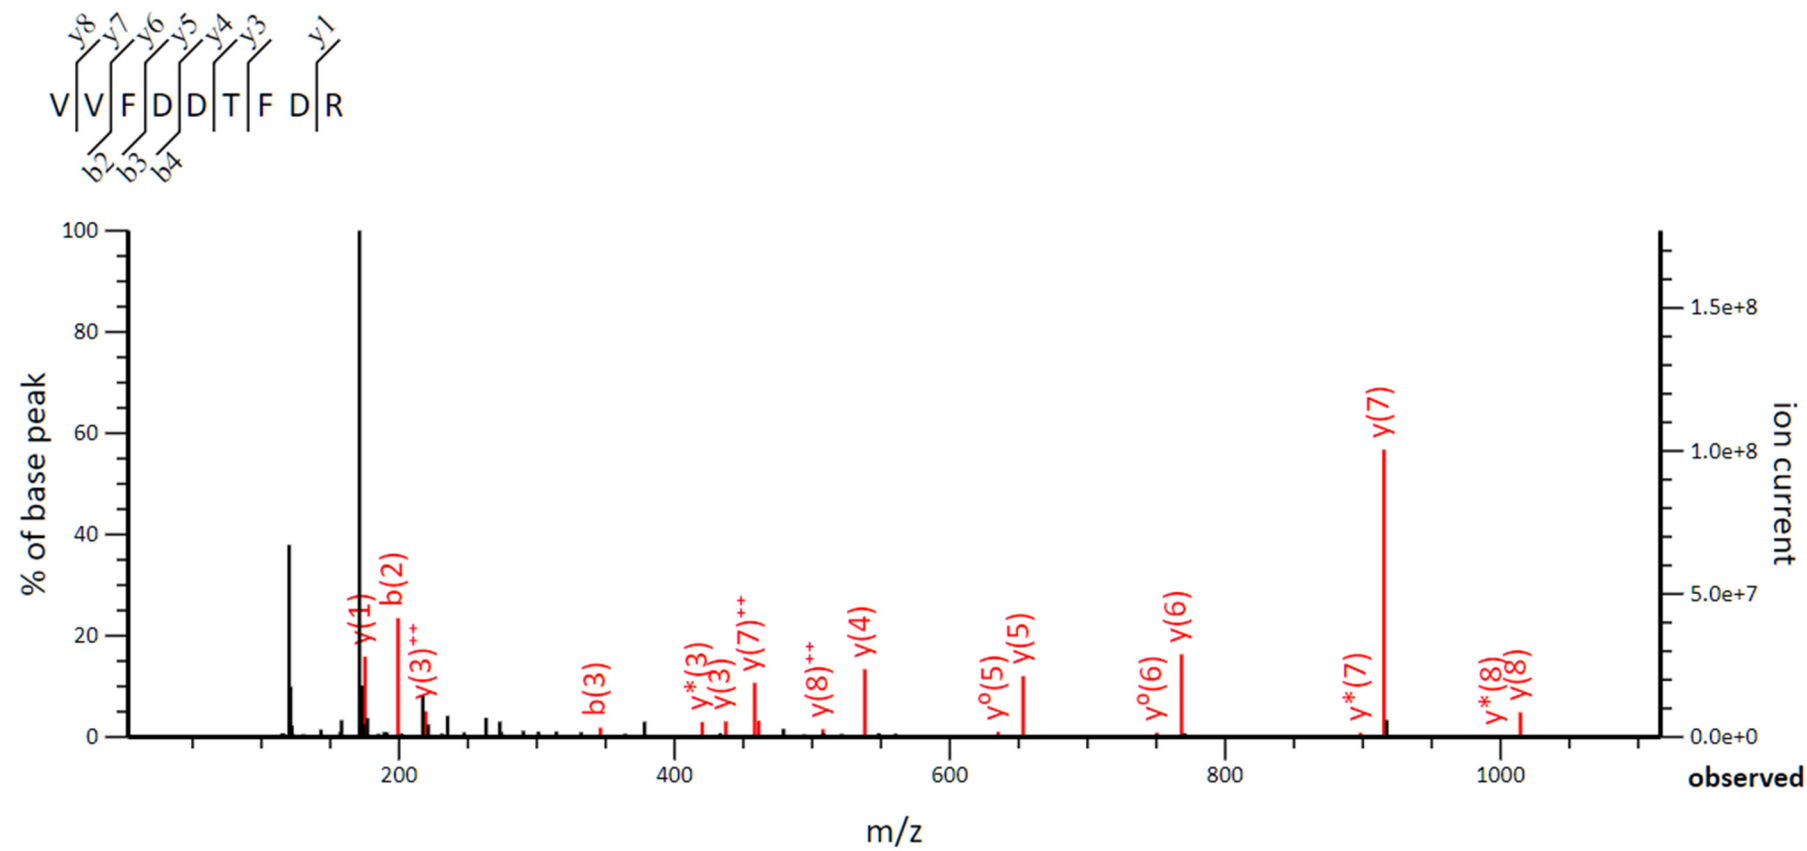

**Monoisotopic mass of neutral peptide Mr(calc):** 1112.5139

**Ions Score:** 43 **Expect:** 0.0017

**Matches:** 20/72 fragment ions using 38 most intense peaks

| # | b        | b <sup>++</sup> | b <sup>0</sup> | b <sup>0++</sup> | Seq. | y         | y <sup>++</sup> | y*       | y <sup>*++</sup> | y <sup>0</sup> | y <sup>0++</sup> | # |
|---|----------|-----------------|----------------|------------------|------|-----------|-----------------|----------|------------------|----------------|------------------|---|
| 1 | 100.0757 | 50.5415         |                |                  | V    |           |                 |          |                  |                |                  | 9 |
| 2 | 199.1441 | 100.0757        |                |                  | V    | 1014.4527 | 507.7300        | 997.4262 | 499.2167         | 996.4421       | 498.7247         | 8 |
| 3 | 346.2125 | 173.6099        |                |                  | F    | 915.3843  | 458.1958        | 898.3577 | 449.6825         | 897.3737       | 449.1905         | 7 |
| 4 | 461.2395 | 231.1234        | 443.2289       | 222.1181         | D    | 768.3159  | 384.6616        | 751.2893 | 376.1483         | 750.3053       | 375.6563         | 6 |
| 5 | 576.2664 | 288.6368        | 558.2558       | 279.6316         | D    | 653.2889  | 327.1481        | 636.2624 | 318.6348         | 635.2784       | 318.1428         | 5 |
| 6 | 677.3141 | 339.1607        | 659.3035       | 330.1554         | T    | 538.2620  | 269.6346        | 521.2354 | 261.1214         | 520.2514       | 260.6293         | 4 |
| 7 | 824.3825 | 412.6949        | 806.3719       | 403.6896         | F    | 437.2143  | 219.1108        | 420.1878 | 210.5975         | 419.2037       | 210.1055         | 3 |
| 8 | 939.4094 | 470.2084        | 921.3989       | 461.2031         | D    | 290.1459  | 145.5766        | 273.1193 | 137.0633         | 272.1353       | 136.5713         | 2 |
| 9 |          |                 |                |                  | R    | 175.1190  | 88.0631         | 158.0924 | 79.5498          |                |                  | 1 |



MS/MS Fragmentation of **EPMTVSSDQMAK** found in **CAH3**

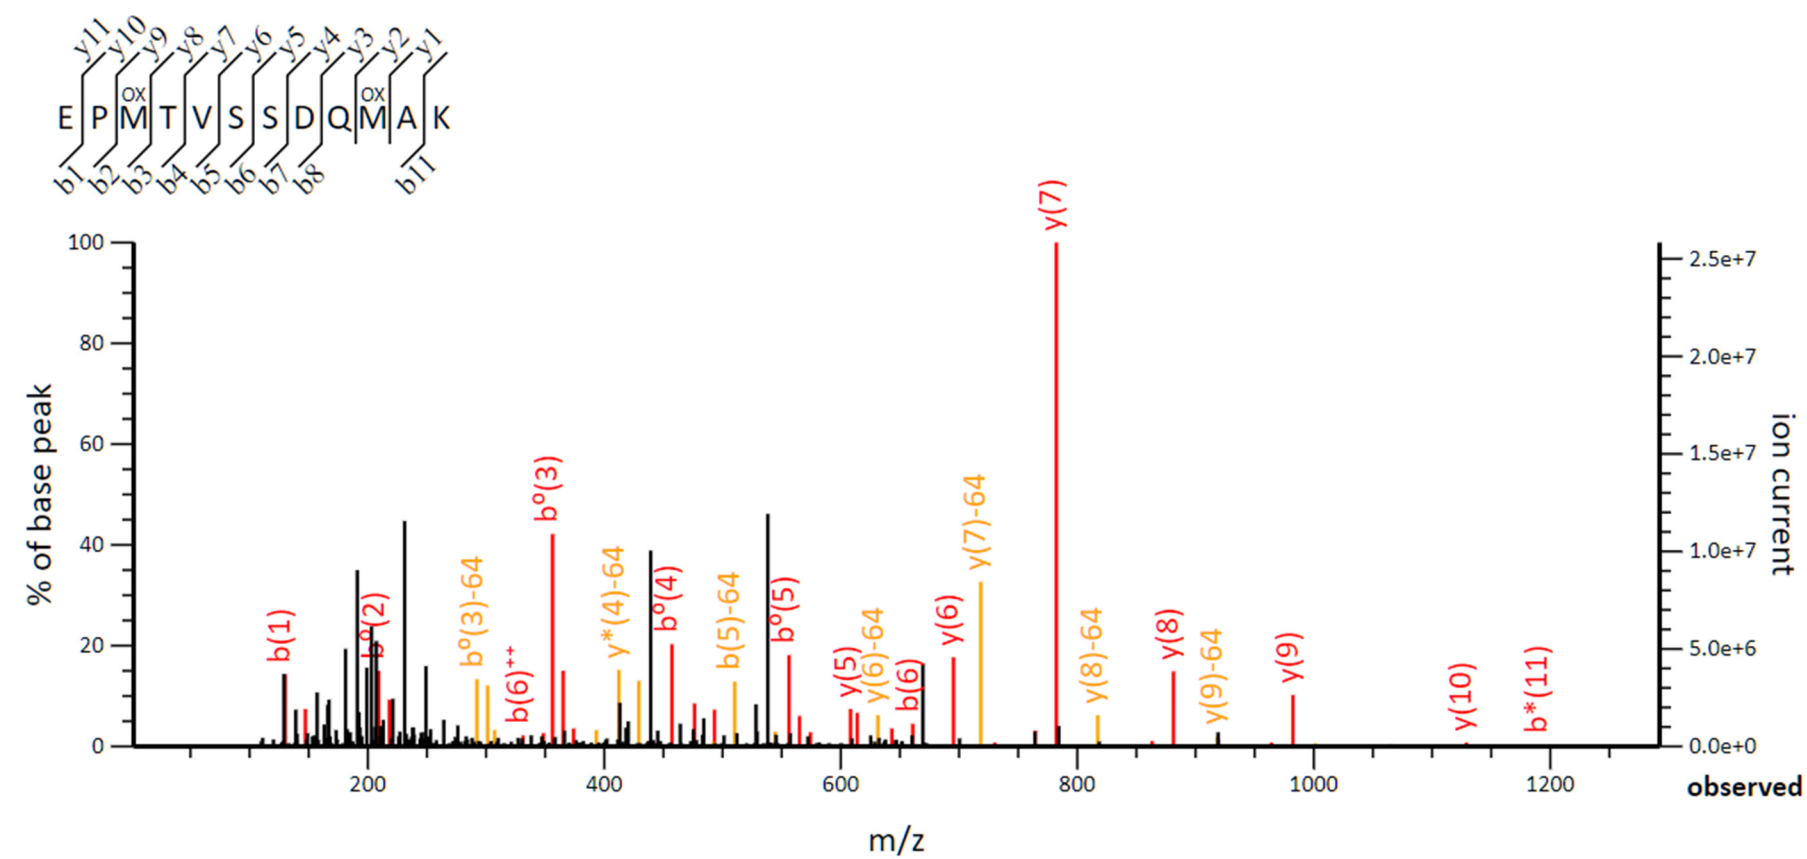

**Monoisotopic mass of neutral peptide Mr(calc):** 1354.5745

**Ions Score:** 53 **Expect:** 4.1e-05

**Matches :** 53/200 fragment ions using 84 most intense peaks

| #  | b         | b <sup>++</sup> | b <sup>*</sup> | b <sup>***</sup> | b <sup>0</sup> | b <sup>0++</sup> | Seq. | y         | y <sup>++</sup> | y <sup>*</sup> | y <sup>***</sup> | y <sup>0</sup> | y <sup>0++</sup> | #  |
|----|-----------|-----------------|----------------|------------------|----------------|------------------|------|-----------|-----------------|----------------|------------------|----------------|------------------|----|
| 1  | 130.0499  | 65.5286         |                |                  | 112.0393       | 56.5233          | E    |           |                 |                |                  |                |                  | 12 |
| 2  | 227.1026  | 114.0550        |                |                  | 209.0921       | 105.0497         | P    | 1226.5392 | 613.7732        | 1209.5126      | 605.2599         | 1208.5286      | 604.7679         | 11 |
| 3  | 374.1380  | 187.5727        |                |                  | 356.1275       | 178.5674         | M    | 1129.4864 | 565.2468        | 1112.4598      | 556.7336         | 1111.4758      | 556.2415         | 10 |
| 4  | 475.1857  | 238.0965        |                |                  | 457.1751       | 229.0912         | T    | 982.4510  | 491.7291        | 965.4244       | 483.2159         | 964.4404       | 482.7238         | 9  |
| 5  | 574.2541  | 287.6307        |                |                  | 556.2436       | 278.6254         | V    | 881.4033  | 441.2053        | 864.3768       | 432.6920         | 863.3927       | 432.2000         | 8  |
| 6  | 661.2862  | 331.1467        |                |                  | 643.2756       | 322.1414         | S    | 782.3349  | 391.6711        | 765.3083       | 383.1578         | 764.3243       | 382.6658         | 7  |
| 7  | 748.3182  | 374.6627        |                |                  | 730.3076       | 365.6574         | S    | 695.3029  | 348.1551        | 678.2763       | 339.6418         | 677.2923       | 339.1498         | 6  |
| 8  | 863.3451  | 432.1762        |                |                  | 845.3346       | 423.1709         | D    | 608.2708  | 304.6391        | 591.2443       | 296.1258         | 590.2603       | 295.6338         | 5  |
| 9  | 991.4037  | 496.2055        | 974.3772       | 487.6922         | 973.3931       | 487.2002         | Q    | 493.2439  | 247.1256        | 476.2173       | 238.6123         |                |                  | 4  |
| 10 | 1138.4391 | 569.7232        | 1121.4126      | 561.2099         | 1120.4285      | 560.7179         | M    | 365.1853  | 183.0963        | 348.1588       | 174.5830         |                |                  | 3  |
| 11 | 1209.4762 | 605.2417        | 1192.4497      | 596.7285         | 1191.4657      | 596.2365         | A    | 218.1499  | 109.5786        | 201.1234       | 101.0653         |                |                  | 2  |
| 12 |           |                 |                |                  |                |                  | K    | 147.1128  | 74.0600         | 130.0863       | 65.5468          |                |                  | 1  |

MS/MS Fragmentation of QEPGENSEILPSLK found in GPX3

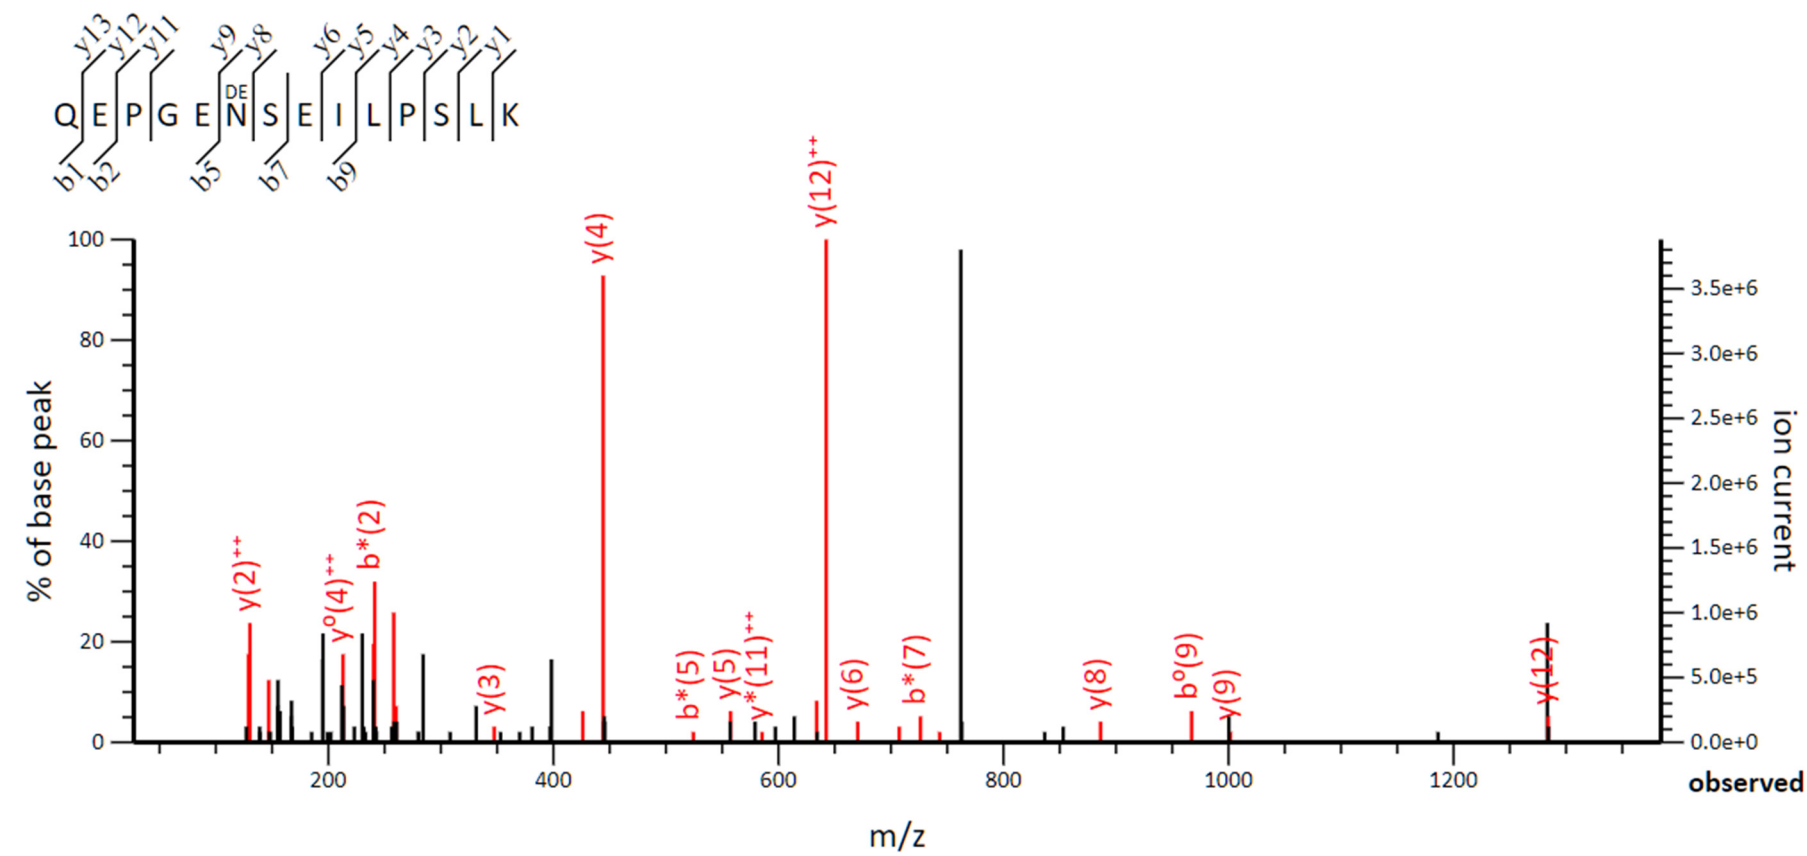

**Monoisotopic mass of neutral peptide Mr(calc):** 1540.7620

**Ions Score:** 57 **Expect:** 0.00014

**Matches :** 31/150 fragment ions using 51 most intense peaks

| #  | b         | b <sup>++</sup> | b <sup>*</sup> | b <sup>***</sup> | b <sup>0</sup> | b <sup>0++</sup> | Seq. | y         | y <sup>++</sup> | y <sup>*</sup> | y <sup>***</sup> | y <sup>0</sup> | y <sup>0++</sup> | #  |
|----|-----------|-----------------|----------------|------------------|----------------|------------------|------|-----------|-----------------|----------------|------------------|----------------|------------------|----|
| 1  | 129.0659  | 65.0366         | 112.0393       | 56.5233          |                |                  | Q    |           |                 |                |                  |                |                  | 14 |
| 2  | 258.1084  | 129.5579        | 241.0819       | 121.0446         | 240.0979       | 120.5526         | E    | 1413.7108 | 707.3590        | 1396.6842      | 698.8457         | 1395.7002      | 698.3537         | 13 |
| 3  | 355.1612  | 178.0842        | 338.1347       | 169.5710         | 337.1506       | 169.0790         | P    | 1284.6682 | 642.8377        | 1267.6416      | 634.3244         | 1266.6576      | 633.8324         | 12 |
| 4  | 412.1827  | 206.5950        | 395.1561       | 198.0817         | 394.1721       | 197.5897         | G    | 1187.6154 | 594.3113        | 1170.5889      | 585.7981         | 1169.6048      | 585.3061         | 11 |
| 5  | 541.2253  | 271.1163        | 524.1987       | 262.6030         | 523.2147       | 262.1110         | E    | 1130.5939 | 565.8006        | 1113.5674      | 557.2873         | 1112.5834      | 556.7953         | 10 |
| 6  | 656.2522  | 328.6297        | 639.2257       | 320.1165         | 638.2416       | 319.6245         | N    | 1001.5514 | 501.2793        | 984.5248       | 492.7660         | 983.5408       | 492.2740         | 9  |
| 7  | 743.2842  | 372.1458        | 726.2577       | 363.6325         | 725.2737       | 363.1405         | S    | 886.5244  | 443.7658        | 869.4979       | 435.2526         | 868.5138       | 434.7606         | 8  |
| 8  | 872.3268  | 436.6671        | 855.3003       | 428.1538         | 854.3163       | 427.6618         | E    | 799.4924  | 400.2498        | 782.4658       | 391.7366         | 781.4818       | 391.2445         | 7  |
| 9  | 985.4109  | 493.2091        | 968.3843       | 484.6958         | 967.4003       | 484.2038         | I    | 670.4498  | 335.7285        | 653.4232       | 327.2153         | 652.4392       | 326.7232         | 6  |
| 10 | 1098.4950 | 549.7511        | 1081.4684      | 541.2378         | 1080.4844      | 540.7458         | L    | 557.3657  | 279.1865        | 540.3392       | 270.6732         | 539.3552       | 270.1812         | 5  |
| 11 | 1195.5477 | 598.2775        | 1178.5212      | 589.7642         | 1177.5372      | 589.2722         | P    | 444.2817  | 222.6445        | 427.2551       | 214.1312         | 426.2711       | 213.6392         | 4  |
| 12 | 1282.5798 | 641.7935        | 1265.5532      | 633.2802         | 1264.5692      | 632.7882         | S    | 347.2289  | 174.1181        | 330.2023       | 165.6048         | 329.2183       | 165.1128         | 3  |
| 13 | 1395.6638 | 698.3355        | 1378.6373      | 689.8223         | 1377.6533      | 689.3303         | L    | 260.1969  | 130.6021        | 243.1703       | 122.0888         |                |                  | 2  |
| 14 |           |                 |                |                  |                |                  | K    | 147.1128  | 74.0600         | 130.0863       | 65.5468          |                |                  | 1  |

MS/MS Fragmentation of **NSCPPTAELLGSPGR** found in **GPX3**

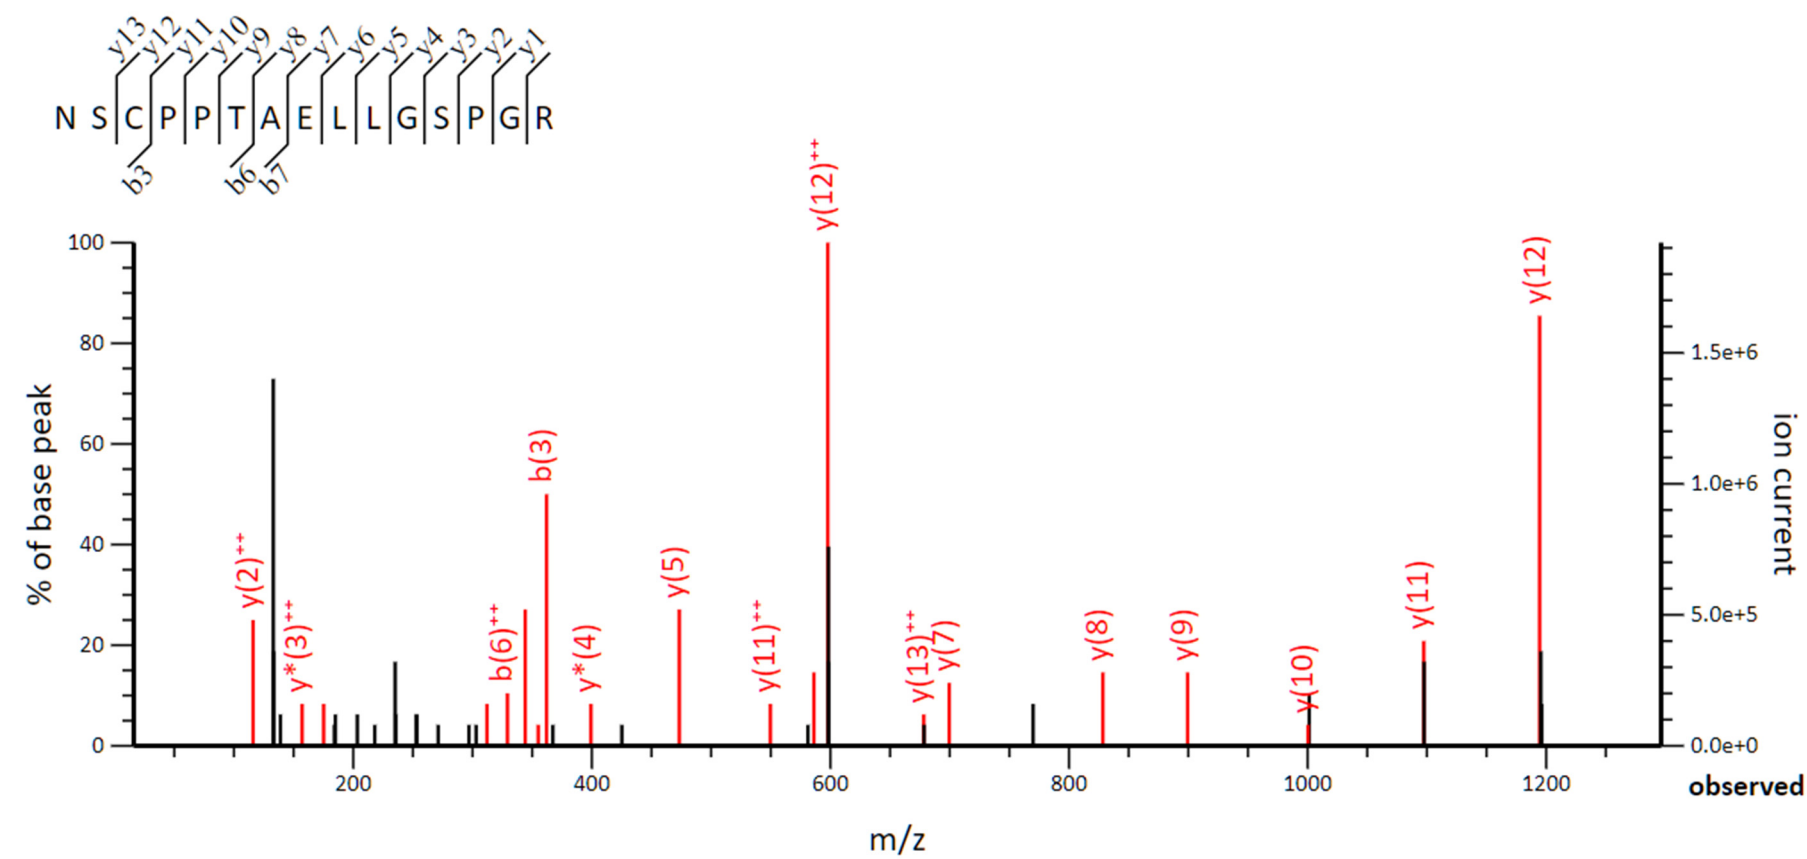

**Monoisotopic mass of neutral peptide Mr(calc):** 1554.7460

**Ions Score:** 68 **Expect:** 2.2e-06

**Matches :** 21/160 fragment ions using 35 most intense peaks

| #  | b         | b <sup>++</sup> | b <sup>*</sup> | b <sup>*++</sup> | b <sup>0</sup> | b <sup>0++</sup> | Seq. | y         | y <sup>++</sup> | y <sup>*</sup> | y <sup>*++</sup> | y <sup>0</sup> | y <sup>0++</sup> | #  |
|----|-----------|-----------------|----------------|------------------|----------------|------------------|------|-----------|-----------------|----------------|------------------|----------------|------------------|----|
| 1  | 115.0502  | 58.0287         | 98.0237        | 49.5155          |                |                  | N    |           |                 |                |                  |                |                  | 15 |
| 2  | 202.0822  | 101.5448        | 185.0557       | 93.0315          | 184.0717       | 92.5395          | S    | 1441.7104 | 721.3588        | 1424.6838      | 712.8456         | 1423.6998      | 712.3536         | 14 |
| 3  | 362.1129  | 181.5601        | 345.0863       | 173.0468         | 344.1023       | 172.5548         | C    | 1354.6784 | 677.8428        | 1337.6518      | 669.3295         | 1336.6678      | 668.8375         | 13 |
| 4  | 459.1656  | 230.0865        | 442.1391       | 221.5732         | 441.1551       | 221.0812         | P    | 1194.6477 | 597.8275        | 1177.6212      | 589.3142         | 1176.6371      | 588.8222         | 12 |
| 5  | 556.2184  | 278.6128        | 539.1919       | 270.0996         | 538.2078       | 269.6076         | P    | 1097.5949 | 549.3011        | 1080.5684      | 540.7878         | 1079.5844      | 540.2958         | 11 |
| 6  | 657.2661  | 329.1367        | 640.2395       | 320.6234         | 639.2555       | 320.1314         | T    | 1000.5422 | 500.7747        | 983.5156       | 492.2615         | 982.5316       | 491.7694         | 10 |
| 7  | 728.3032  | 364.6552        | 711.2767       | 356.1420         | 710.2926       | 355.6500         | A    | 899.4945  | 450.2509        | 882.4680       | 441.7376         | 881.4839       | 441.2456         | 9  |
| 8  | 857.3458  | 429.1765        | 840.3192       | 420.6633         | 839.3352       | 420.1713         | E    | 828.4574  | 414.7323        | 811.4308       | 406.2191         | 810.4468       | 405.7271         | 8  |
| 9  | 970.4299  | 485.7186        | 953.4033       | 477.2053         | 952.4193       | 476.7133         | L    | 699.4148  | 350.2110        | 682.3883       | 341.6978         | 681.4042       | 341.2058         | 7  |
| 10 | 1083.5139 | 542.2606        | 1066.4874      | 533.7473         | 1065.5034      | 533.2553         | L    | 586.3307  | 293.6690        | 569.3042       | 285.1557         | 568.3202       | 284.6637         | 6  |
| 11 | 1140.5354 | 570.7713        | 1123.5088      | 562.2581         | 1122.5248      | 561.7660         | G    | 473.2467  | 237.1270        | 456.2201       | 228.6137         | 455.2361       | 228.1217         | 5  |
| 12 | 1227.5674 | 614.2873        | 1210.5409      | 605.7741         | 1209.5568      | 605.2821         | S    | 416.2252  | 208.6162        | 399.1987       | 200.1030         | 398.2146       | 199.6110         | 4  |
| 13 | 1324.6202 | 662.8137        | 1307.5936      | 654.3005         | 1306.6096      | 653.8084         | P    | 329.1932  | 165.1002        | 312.1666       | 156.5870         |                |                  | 3  |
| 14 | 1381.6416 | 691.3245        | 1364.6151      | 682.8112         | 1363.6311      | 682.3192         | G    | 232.1404  | 116.5738        | 215.1139       | 108.0606         |                |                  | 2  |
| 15 |           |                 |                |                  |                |                  | R    | 175.1190  | 88.0631         | 158.0924       | 79.5498          |                |                  | 1  |

MS/MS Fragmentation of **LYSEFLGK** found in **GSTM2**

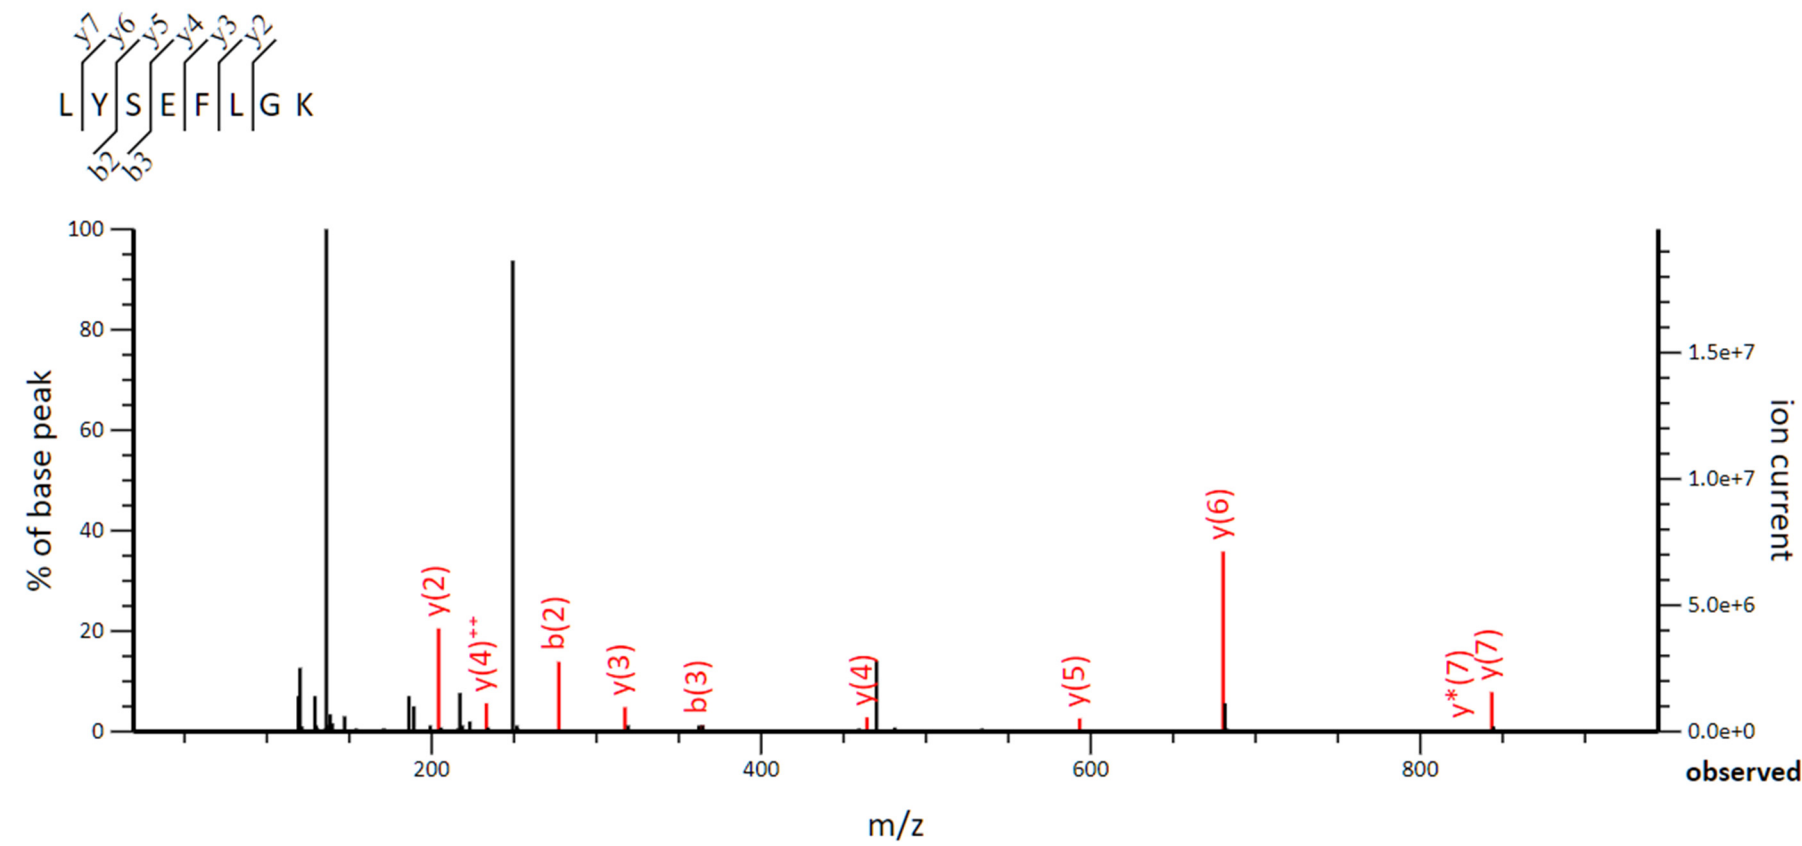

**Monoisotopic mass of neutral peptide Mr(calc):** 955.5015

**Ions Score:** 32 **Expect:** 0.0063

**Matches :** 10/58 fragment ions using 24 most intense peaks

| # | b        | b <sup>++</sup> | b <sup>0</sup> | b <sup>0++</sup> | Seq. | y        | y <sup>++</sup> | y <sup>*</sup> | y <sup>*++</sup> | y <sup>0</sup> | y <sup>0++</sup> | # |
|---|----------|-----------------|----------------|------------------|------|----------|-----------------|----------------|------------------|----------------|------------------|---|
| 1 | 114.0913 | 57.5493         |                |                  | L    |          |                 |                |                  |                |                  | 8 |
| 2 | 277.1547 | 139.0810        |                |                  | Y    | 843.4247 | 422.2160        | 826.3981       | 413.7027         | 825.4141       | 413.2107         | 7 |
| 3 | 364.1867 | 182.5970        | 346.1761       | 173.5917         | S    | 680.3614 | 340.6843        | 663.3348       | 332.1710         | 662.3508       | 331.6790         | 6 |
| 4 | 493.2293 | 247.1183        | 475.2187       | 238.1130         | E    | 593.3293 | 297.1683        | 576.3028       | 288.6550         | 575.3188       | 288.1630         | 5 |
| 5 | 640.2977 | 320.6525        | 622.2871       | 311.6472         | F    | 464.2867 | 232.6470        | 447.2602       | 224.1337         |                |                  | 4 |
| 6 | 753.3818 | 377.1945        | 735.3712       | 368.1892         | L    | 317.2183 | 159.1128        | 300.1918       | 150.5995         |                |                  | 3 |
| 7 | 810.4032 | 405.7053        | 792.3927       | 396.7000         | G    | 204.1343 | 102.5708        | 187.1077       | 94.0575          |                |                  | 2 |
| 8 |          |                 |                |                  | K    | 147.1128 | 74.0600         | 130.0863       | 65.5468          |                |                  | 1 |



MS/MS Fragmentation of **ITQSNAILR** found in **GSTM2**

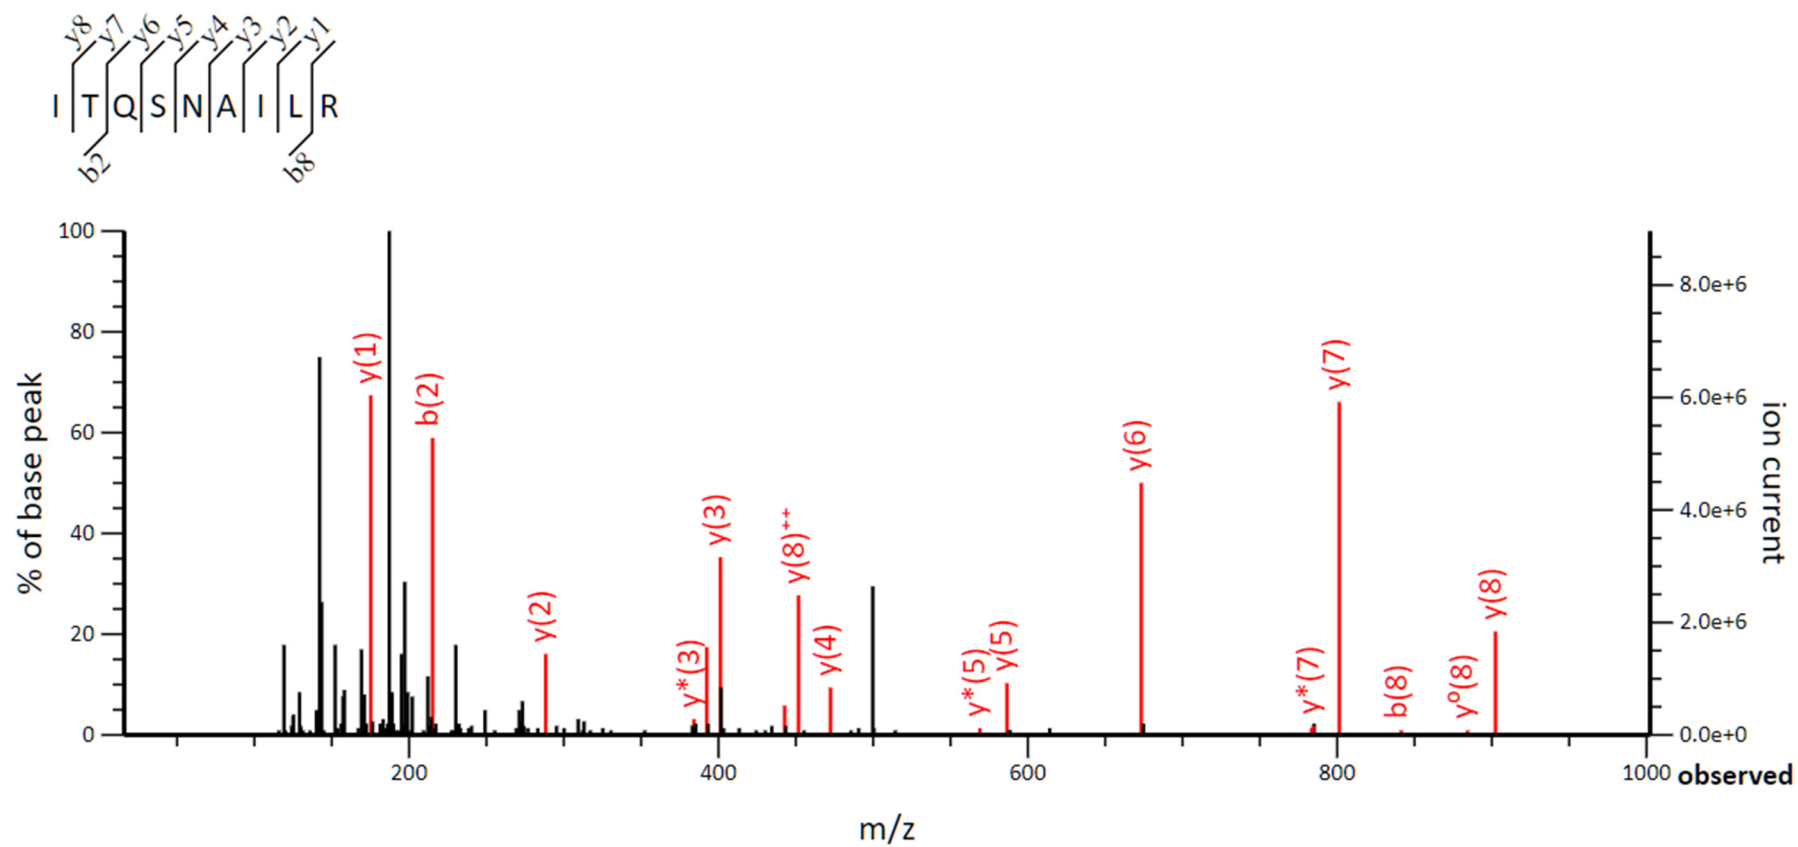

**Monoisotopic mass of neutral peptide Mr(calc):** 1014.5822

**Ions Score:** 65 **Expect:** 2.3e-05

**Matches :** 22/80 fragment ions using 29 most intense peaks

| # | b        | b <sup>++</sup> | b <sup>*</sup> | b <sup>***</sup> | b <sup>0</sup> | b <sup>0++</sup> | Seq. | y        | y <sup>++</sup> | y <sup>*</sup> | y <sup>***</sup> | y <sup>0</sup> | y <sup>0++</sup> | # |
|---|----------|-----------------|----------------|------------------|----------------|------------------|------|----------|-----------------|----------------|------------------|----------------|------------------|---|
| 1 | 114.0913 | 57.5493         |                |                  |                |                  | I    |          |                 |                |                  |                |                  | 9 |
| 2 | 215.1390 | 108.0731        |                |                  | 197.1285       | 99.0679          | T    | 902.5054 | 451.7563        | 885.4789       | 443.2431         | 884.4948       | 442.7511         | 8 |
| 3 | 343.1976 | 172.1024        | 326.1710       | 163.5892         | 325.1870       | 163.0972         | Q    | 801.4577 | 401.2325        | 784.4312       | 392.7192         | 783.4472       | 392.2272         | 7 |
| 4 | 430.2296 | 215.6185        | 413.2031       | 207.1052         | 412.2191       | 206.6132         | S    | 673.3991 | 337.2032        | 656.3726       | 328.6899         | 655.3886       | 328.1979         | 6 |
| 5 | 544.2726 | 272.6399        | 527.2460       | 264.1266         | 526.2620       | 263.6346         | N    | 586.3671 | 293.6872        | 569.3406       | 285.1739         |                |                  | 5 |
| 6 | 615.3097 | 308.1585        | 598.2831       | 299.6452         | 597.2991       | 299.1532         | A    | 472.3242 | 236.6657        | 455.2976       | 228.1525         |                |                  | 4 |
| 7 | 728.3937 | 364.7005        | 711.3672       | 356.1872         | 710.3832       | 355.6952         | I    | 401.2871 | 201.1472        | 384.2605       | 192.6339         |                |                  | 3 |
| 8 | 841.4778 | 421.2425        | 824.4512       | 412.7293         | 823.4672       | 412.2373         | L    | 288.2030 | 144.6051        | 271.1765       | 136.0919         |                |                  | 2 |
| 9 |          |                 |                |                  |                |                  | R    | 175.1190 | 88.0631         | 158.0924       | 79.5498          |                |                  | 1 |

MS/MS Fragmentation of **CLDAFPNLK** found in **GSTM2**

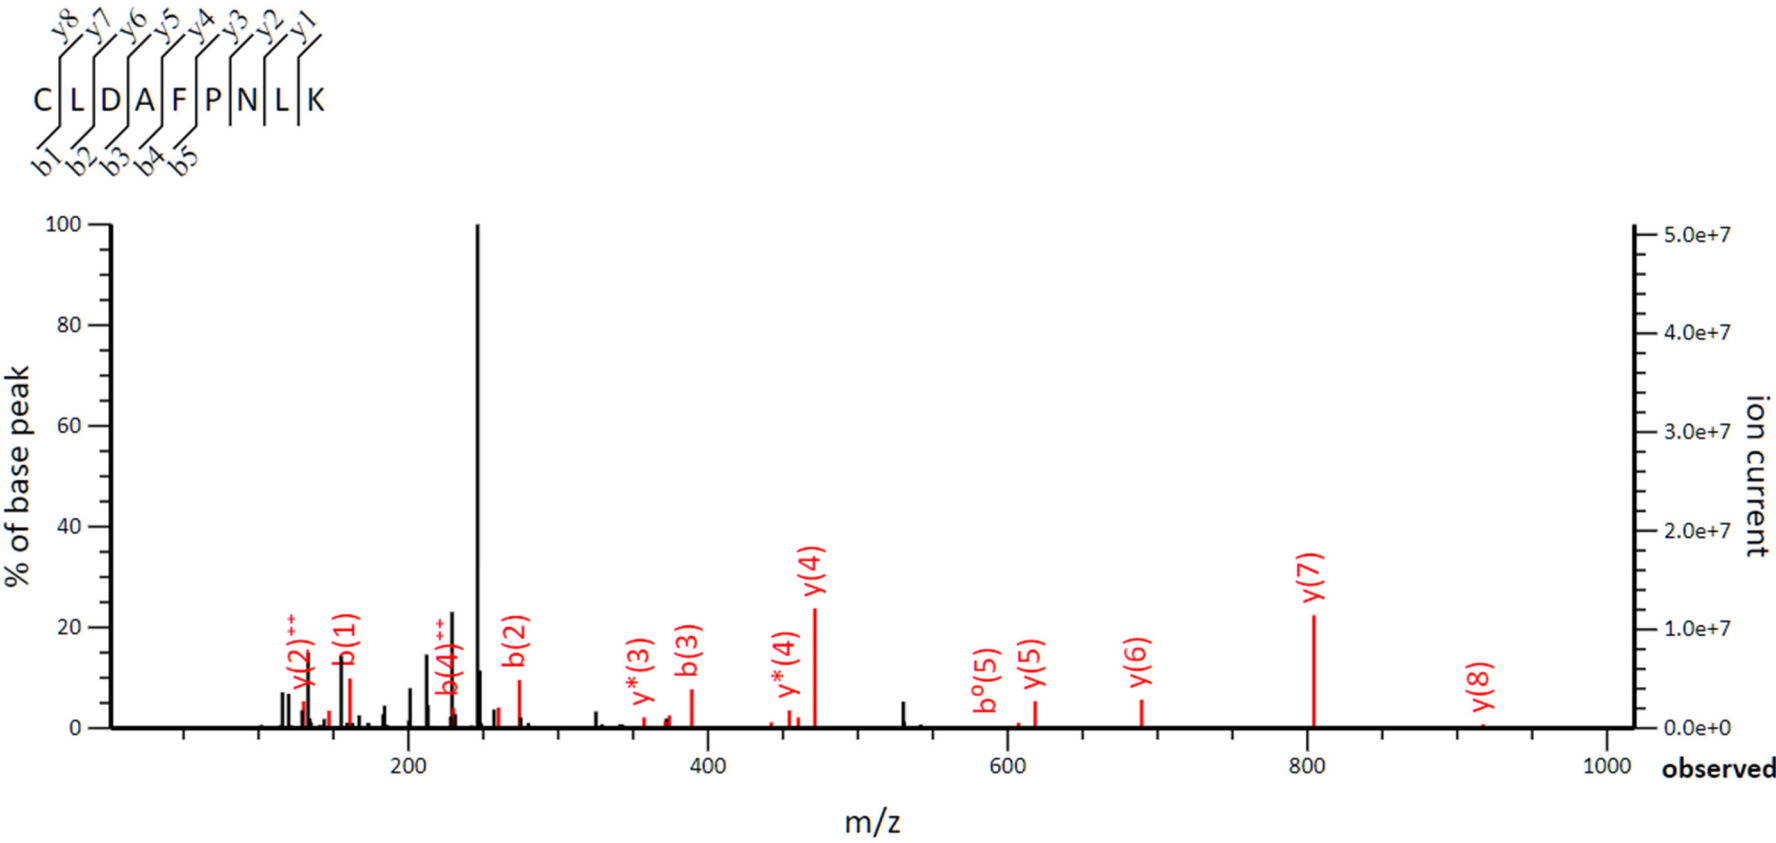

**Monoisotopic mass of neutral peptide Mr(calc):** 1076.5325

**Ions Score:** 37 **Expect:** 0.0037

**Matches :** 22/68 fragment ions using 62 most intense peaks

| # | b        | b <sup>++</sup> | b <sup>*</sup> | b <sup>+++</sup> | b <sup>0</sup> | b <sup>0++</sup> | Seq. | y        | y <sup>++</sup> | y <sup>*</sup> | y <sup>+++</sup> | y <sup>0</sup> | y <sup>0++</sup> | # |
|---|----------|-----------------|----------------|------------------|----------------|------------------|------|----------|-----------------|----------------|------------------|----------------|------------------|---|
| 1 | 161.0379 | 81.0226         |                |                  |                |                  | C    |          |                 |                |                  |                |                  | 9 |
| 2 | 274.1220 | 137.5646        |                |                  |                |                  | L    | 917.5091 | 459.2582        | 900.4825       | 450.7449         | 899.4985       | 450.2529         | 8 |
| 3 | 389.1489 | 195.0781        |                |                  | 371.1384       | 186.0728         | D    | 804.4250 | 402.7162        | 787.3985       | 394.2029         | 786.4145       | 393.7109         | 7 |
| 4 | 460.1860 | 230.5967        |                |                  | 442.1755       | 221.5914         | A    | 689.3981 | 345.2027        | 672.3715       | 336.6894         |                |                  | 6 |
| 5 | 607.2545 | 304.1309        |                |                  | 589.2439       | 295.1256         | F    | 618.3610 | 309.6841        | 601.3344       | 301.1708         |                |                  | 5 |
| 6 | 704.3072 | 352.6573        |                |                  | 686.2967       | 343.6520         | P    | 471.2926 | 236.1499        | 454.2660       | 227.6366         |                |                  | 4 |
| 7 | 818.3502 | 409.6787        | 801.3236       | 401.1654         | 800.3396       | 400.6734         | N    | 374.2398 | 187.6235        | 357.2132       | 179.1103         |                |                  | 3 |
| 8 | 931.4342 | 466.2207        | 914.4077       | 457.7075         | 913.4237       | 457.2155         | L    | 260.1969 | 130.6021        | 243.1703       | 122.0888         |                |                  | 2 |
| 9 |          |                 |                |                  |                |                  | K    | 147.1128 | 74.0600         | 130.0863       | 65.5468          |                |                  | 1 |

MS/MS Fragmentation of **YSM<sup>ox</sup>GDAPDYDR** found in **GSTM2**

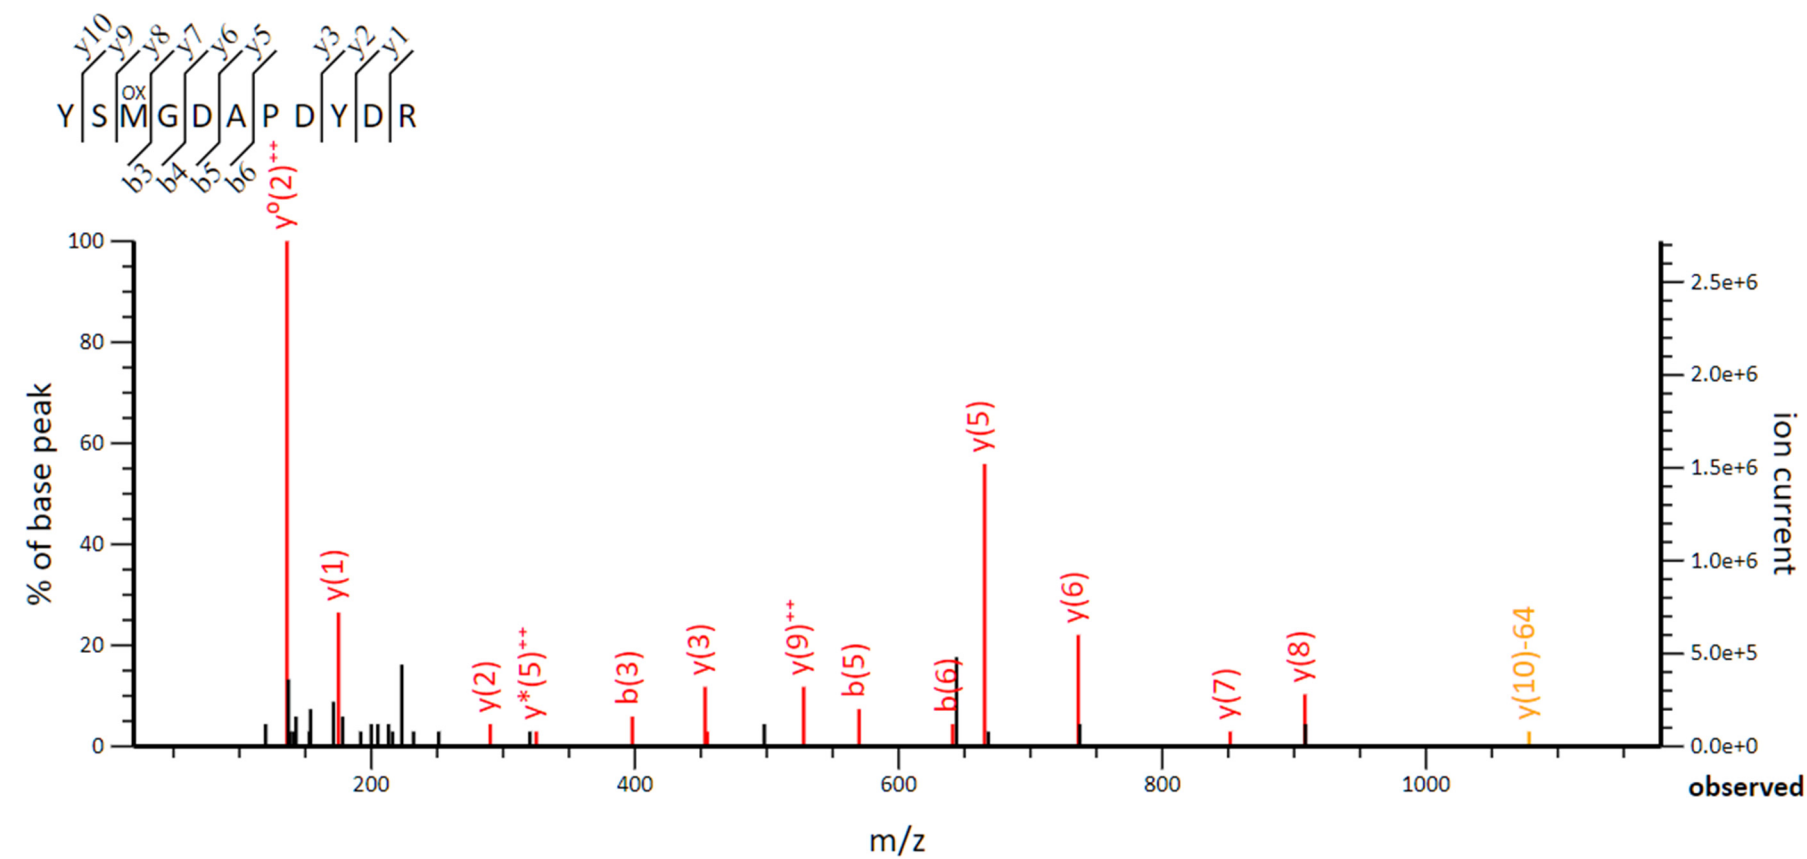

**Monoisotopic mass of neutral peptide Mr(calc):** 1304.4979

**Ions Score:** 58 **Expect:** 0.00016

**Matches :** 17/140 fragment ions using 23 most intense peaks

| #  | b         | b <sup>++</sup> | b <sup>0</sup> | b <sup>0++</sup> | Seq. | y         | y <sup>++</sup> | y <sup>*</sup> | y <sup>+++</sup> | y <sup>0</sup> | y <sup>0++</sup> | #  |
|----|-----------|-----------------|----------------|------------------|------|-----------|-----------------|----------------|------------------|----------------|------------------|----|
| 1  | 164.0706  | 82.5389         |                |                  | Y    |           |                 |                |                  |                |                  | 11 |
| 2  | 251.1026  | 126.0550        | 233.0921       | 117.0497         | S    | 1142.4419 | 571.7246        | 1125.4153      | 563.2113         | 1124.4313      | 562.7193         | 10 |
| 3  | 398.1380  | 199.5727        | 380.1275       | 190.5674         | M    | 1055.4099 | 528.2086        | 1038.3833      | 519.6953         | 1037.3993      | 519.2033         | 9  |
| 4  | 455.1595  | 228.0834        | 437.1489       | 219.0781         | G    | 908.3745  | 454.6909        | 891.3479       | 446.1776         | 890.3639       | 445.6856         | 8  |
| 5  | 570.1864  | 285.5969        | 552.1759       | 276.5916         | D    | 851.3530  | 426.1801        | 834.3264       | 417.6669         | 833.3424       | 417.1748         | 7  |
| 6  | 641.2236  | 321.1154        | 623.2130       | 312.1101         | A    | 736.3260  | 368.6667        | 719.2995       | 360.1534         | 718.3155       | 359.6614         | 6  |
| 7  | 738.2763  | 369.6418        | 720.2658       | 360.6365         | P    | 665.2889  | 333.1481        | 648.2624       | 324.6348         | 647.2784       | 324.1428         | 5  |
| 8  | 853.3033  | 427.1553        | 835.2927       | 418.1500         | D    | 568.2362  | 284.6217        | 551.2096       | 276.1084         | 550.2256       | 275.6164         | 4  |
| 9  | 1016.3666 | 508.6869        | 998.3560       | 499.6817         | Y    | 453.2092  | 227.1082        | 436.1827       | 218.5950         | 435.1987       | 218.1030         | 3  |
| 10 | 1131.3935 | 566.2004        | 1113.3830      | 557.1951         | D    | 290.1459  | 145.5766        | 273.1193       | 137.0633         | 272.1353       | 136.5713         | 2  |
| 11 |           |                 |                |                  | R    | 175.1190  | 88.0631         | 158.0924       | 79.5498          |                |                  | 1  |

MS/MS Fragmentation of **VDVLENQAMDTR** found in **GSTM2**

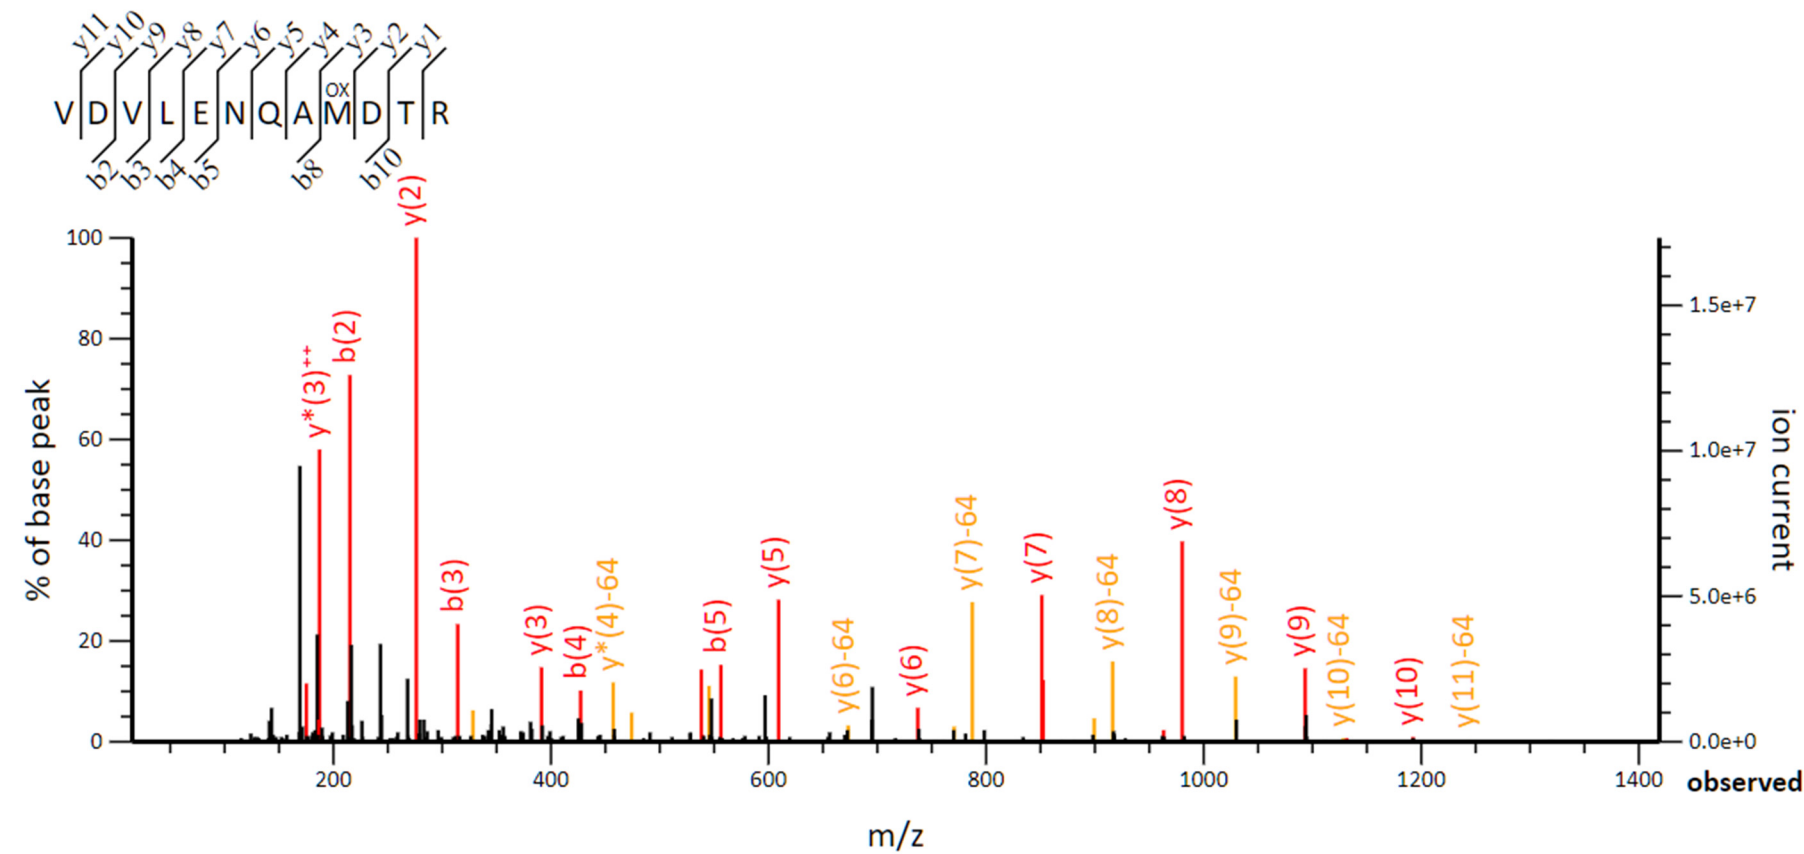

**Monoisotopic mass of neutral peptide Mr(calc):** 1405.6507

**Ions Score:** 78 **Expect:** 1.7e-06

**Matches :** 41/184 fragment ions using 46 most intense peaks

| #  | b         | b <sup>++</sup> | b <sup>*</sup> | b <sup>*++</sup> | b <sup>0</sup> | b <sup>0++</sup> | Seq. | y         | y <sup>++</sup> | y <sup>*</sup> | y <sup>*++</sup> | y <sup>0</sup> | y <sup>0++</sup> | #  |
|----|-----------|-----------------|----------------|------------------|----------------|------------------|------|-----------|-----------------|----------------|------------------|----------------|------------------|----|
| 1  | 100.0757  | 50.5415         |                |                  |                |                  | V    |           |                 |                |                  |                |                  | 12 |
| 2  | 215.1026  | 108.0550        |                |                  | 197.0921       | 99.0497          | D    | 1243.5913 | 622.2993        | 1226.5648      | 613.7860         | 1225.5808      | 613.2940         | 11 |
| 3  | 314.1710  | 157.5892        |                |                  | 296.1605       | 148.5839         | V    | 1128.5644 | 564.7858        | 1111.5378      | 556.2726         | 1110.5538      | 555.7805         | 10 |
| 4  | 427.2551  | 214.1312        |                |                  | 409.2445       | 205.1259         | L    | 1029.4960 | 515.2516        | 1012.4694      | 506.7383         | 1011.4854      | 506.2463         | 9  |
| 5  | 556.2977  | 278.6525        |                |                  | 538.2871       | 269.6472         | E    | 916.4119  | 458.7096        | 899.3854       | 450.1963         | 898.4013       | 449.7043         | 8  |
| 6  | 670.3406  | 335.6740        | 653.3141       | 327.1607         | 652.3301       | 326.6687         | N    | 787.3693  | 394.1883        | 770.3428       | 385.6750         | 769.3587       | 385.1830         | 7  |
| 7  | 798.3992  | 399.7032        | 781.3727       | 391.1900         | 780.3886       | 390.6980         | Q    | 673.3264  | 337.1668        | 656.2998       | 328.6536         | 655.3158       | 328.1615         | 6  |
| 8  | 869.4363  | 435.2218        | 852.4098       | 426.7085         | 851.4258       | 426.2165         | A    | 545.2678  | 273.1375        | 528.2413       | 264.6243         | 527.2572       | 264.1323         | 5  |
| 9  | 952.4734  | 476.7404        | 935.4469       | 468.2271         | 934.4629       | 467.7351         | M    | 474.2307  | 237.6190        | 457.2041       | 229.1057         | 456.2201       | 228.6137         | 4  |
| 10 | 1067.5004 | 534.2538        | 1050.4738      | 525.7406         | 1049.4898      | 525.2485         | D    | 391.1936  | 196.1004        | 374.1670       | 187.5872         | 373.1830       | 187.0951         | 3  |
| 11 | 1168.5481 | 584.7777        | 1151.5215      | 576.2644         | 1150.5375      | 575.7724         | T    | 276.1666  | 138.5870        | 259.1401       | 130.0737         | 258.1561       | 129.5817         | 2  |
| 12 |           |                 |                |                  |                |                  | R    | 175.1190  | 88.0631         | 158.0924       | 79.5498          |                |                  | 1  |



MS/MS Fragmentation of **LFLEYTDTSYEDK** found in **GSTM2**

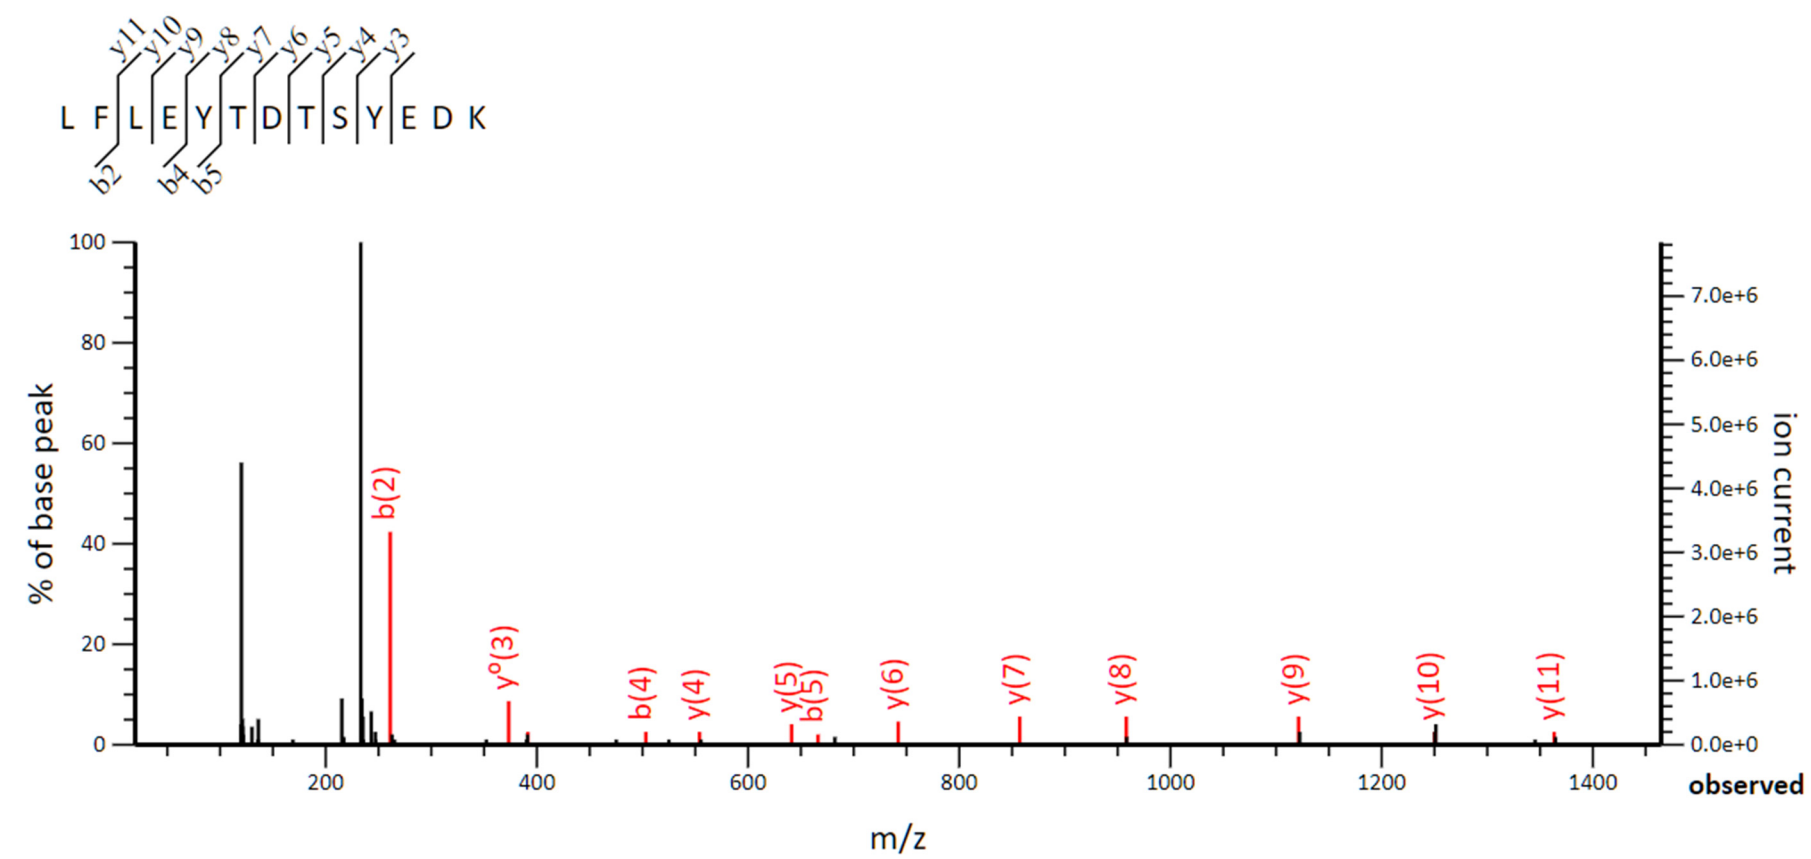

**Monoisotopic mass of neutral peptide Mr(calc):** 1622.7352

**Ions Score:** 63 **Expect:** 1.3e-05

**Matches :** 13/112 fragment ions using 22 most intense peaks

| #  | b         | b <sup>++</sup> | b <sup>0</sup> | b <sup>0++</sup> | Seq. | y         | y <sup>++</sup> | y <sup>*</sup> | y <sup>***</sup> | y <sup>0</sup> | y <sup>0++</sup> | #  |
|----|-----------|-----------------|----------------|------------------|------|-----------|-----------------|----------------|------------------|----------------|------------------|----|
| 1  | 114.0913  | 57.5493         |                |                  | L    |           |                 |                |                  |                |                  | 13 |
| 2  | 261.1598  | 131.0835        |                |                  | F    | 1510.6584 | 755.8328        | 1493.6318      | 747.3196         | 1492.6478      | 746.8276         | 12 |
| 3  | 374.2438  | 187.6255        |                |                  | L    | 1363.5900 | 682.2986        | 1346.5634      | 673.7854         | 1345.5794      | 673.2933         | 11 |
| 4  | 503.2864  | 252.1468        | 485.2758       | 243.1416         | E    | 1250.5059 | 625.7566        | 1233.4794      | 617.2433         | 1232.4954      | 616.7513         | 10 |
| 5  | 666.3497  | 333.6785        | 648.3392       | 324.6732         | Y    | 1121.4633 | 561.2353        | 1104.4368      | 552.7220         | 1103.4528      | 552.2300         | 9  |
| 6  | 767.3974  | 384.2023        | 749.3869       | 375.1971         | T    | 958.4000  | 479.7036        | 941.3734       | 471.1904         | 940.3894       | 470.6984         | 8  |
| 7  | 882.4244  | 441.7158        | 864.4138       | 432.7105         | D    | 857.3523  | 429.1798        | 840.3258       | 420.6665         | 839.3418       | 420.1745         | 7  |
| 8  | 983.4720  | 492.2397        | 965.4615       | 483.2344         | T    | 742.3254  | 371.6663        | 725.2988       | 363.1531         | 724.3148       | 362.6610         | 6  |
| 9  | 1070.5041 | 535.7557        | 1052.4935      | 526.7504         | S    | 641.2777  | 321.1425        | 624.2511       | 312.6292         | 623.2671       | 312.1372         | 5  |
| 10 | 1233.5674 | 617.2873        | 1215.5568      | 608.2821         | Y    | 554.2457  | 277.6265        | 537.2191       | 269.1132         | 536.2351       | 268.6212         | 4  |
| 11 | 1362.6100 | 681.8086        | 1344.5994      | 672.8034         | E    | 391.1823  | 196.0948        | 374.1558       | 187.5815         | 373.1718       | 187.0895         | 3  |
| 12 | 1477.6369 | 739.3221        | 1459.6264      | 730.3168         | D    | 262.1397  | 131.5735        | 245.1132       | 123.0602         | 244.1292       | 122.5682         | 2  |
| 13 |           |                 |                |                  | K    | 147.1128  | 74.0600         | 130.0863       | 65.5468          |                |                  | 1  |

MS/MS Fragmentation of **LFLEYTDTSYEDKK** found in **GSTM2**

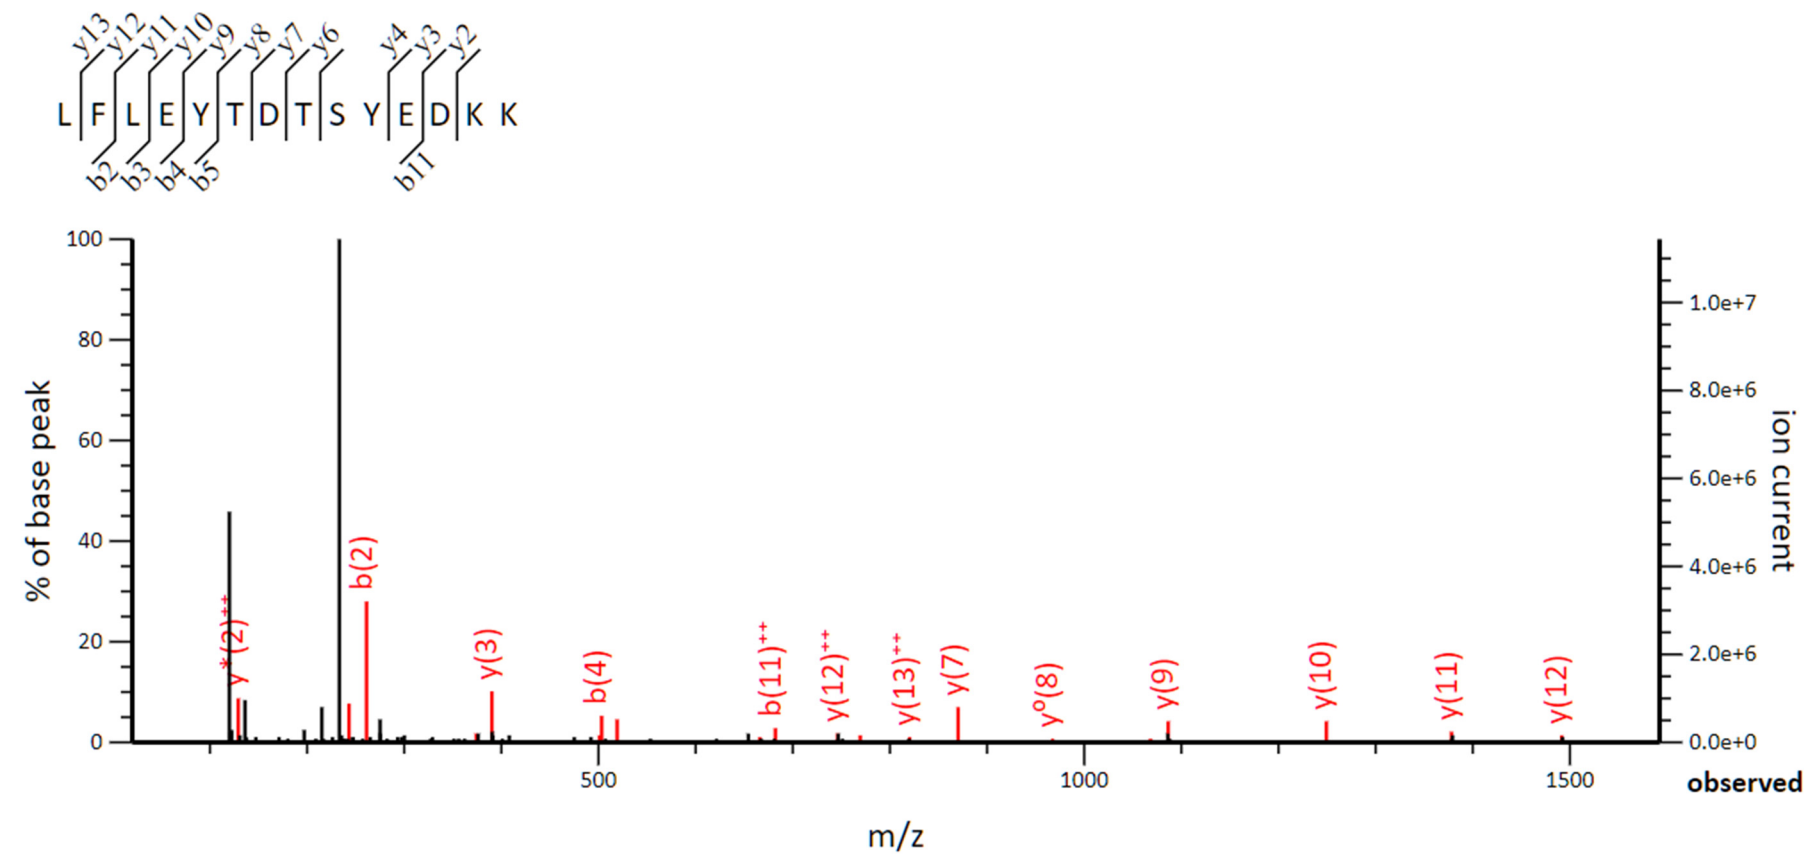

**Monoisotopic mass of neutral peptide Mr(calc):** 1750.8301

**Fixed modifications:** Carbamidomethyl (C) (apply to specified residues or termini only) **Ions Score:** 68 **Expect:** 2.9e-06

**Matches :** 21/122 fragment ions using 31 most intense peaks

| #  | b         | b <sup>++</sup> | b <sup>*</sup> | b <sup>***</sup> | b <sup>0</sup> | b <sup>0++</sup> | Seq. | y         | y <sup>++</sup> | y <sup>*</sup> | y <sup>***</sup> | y <sup>0</sup> | y <sup>0++</sup> | #  |
|----|-----------|-----------------|----------------|------------------|----------------|------------------|------|-----------|-----------------|----------------|------------------|----------------|------------------|----|
| 1  | 114.0913  | 57.5493         |                |                  |                |                  | L    |           |                 |                |                  |                |                  | 14 |
| 2  | 261.1598  | 131.0835        |                |                  |                |                  | F    | 1638.7534 | 819.8803        | 1621.7268      | 811.3670         | 1620.7428      | 810.8750         | 13 |
| 3  | 374.2438  | 187.6255        |                |                  |                |                  | L    | 1491.6849 | 746.3461        | 1474.6584      | 737.8328         | 1473.6744      | 737.3408         | 12 |
| 4  | 503.2864  | 252.1468        |                |                  | 485.2758       | 243.1416         | E    | 1378.6009 | 689.8041        | 1361.5743      | 681.2908         | 1360.5903      | 680.7988         | 11 |
| 5  | 666.3497  | 333.6785        |                |                  | 648.3392       | 324.6732         | Y    | 1249.5583 | 625.2828        | 1232.5317      | 616.7695         | 1231.5477      | 616.2775         | 10 |
| 6  | 767.3974  | 384.2023        |                |                  | 749.3869       | 375.1971         | T    | 1086.4950 | 543.7511        | 1069.4684      | 535.2378         | 1068.4844      | 534.7458         | 9  |
| 7  | 882.4244  | 441.7158        |                |                  | 864.4138       | 432.7105         | D    | 985.4473  | 493.2273        | 968.4207       | 484.7140         | 967.4367       | 484.2220         | 8  |
| 8  | 983.4720  | 492.2397        |                |                  | 965.4615       | 483.2344         | T    | 870.4203  | 435.7138        | 853.3938       | 427.2005         | 852.4098       | 426.7085         | 7  |
| 9  | 1070.5041 | 535.7557        |                |                  | 1052.4935      | 526.7504         | S    | 769.3727  | 385.1900        | 752.3461       | 376.6767         | 751.3621       | 376.1847         | 6  |
| 10 | 1233.5674 | 617.2873        |                |                  | 1215.5568      | 608.2821         | Y    | 682.3406  | 341.6740        | 665.3141       | 333.1607         | 664.3301       | 332.6687         | 5  |
| 11 | 1362.6100 | 681.8086        |                |                  | 1344.5994      | 672.8034         | E    | 519.2773  | 260.1423        | 502.2508       | 251.6290         | 501.2667       | 251.1370         | 4  |
| 12 | 1477.6369 | 739.3221        |                |                  | 1459.6264      | 730.3168         | D    | 390.2347  | 195.6210        | 373.2082       | 187.1077         | 372.2241       | 186.6157         | 3  |
| 13 | 1605.7319 | 803.3696        | 1588.7053      | 794.8563         | 1587.7213      | 794.3643         | K    | 275.2078  | 138.1075        | 258.1812       | 129.5942         |                |                  | 2  |
| 14 |           |                 |                |                  |                |                  | K    | 147.1128  | 74.0600         | 130.0863       | 65.5468          |                |                  | 1  |

MS/MS Fragmentation of **GELLEAIKR** found in **SODM**

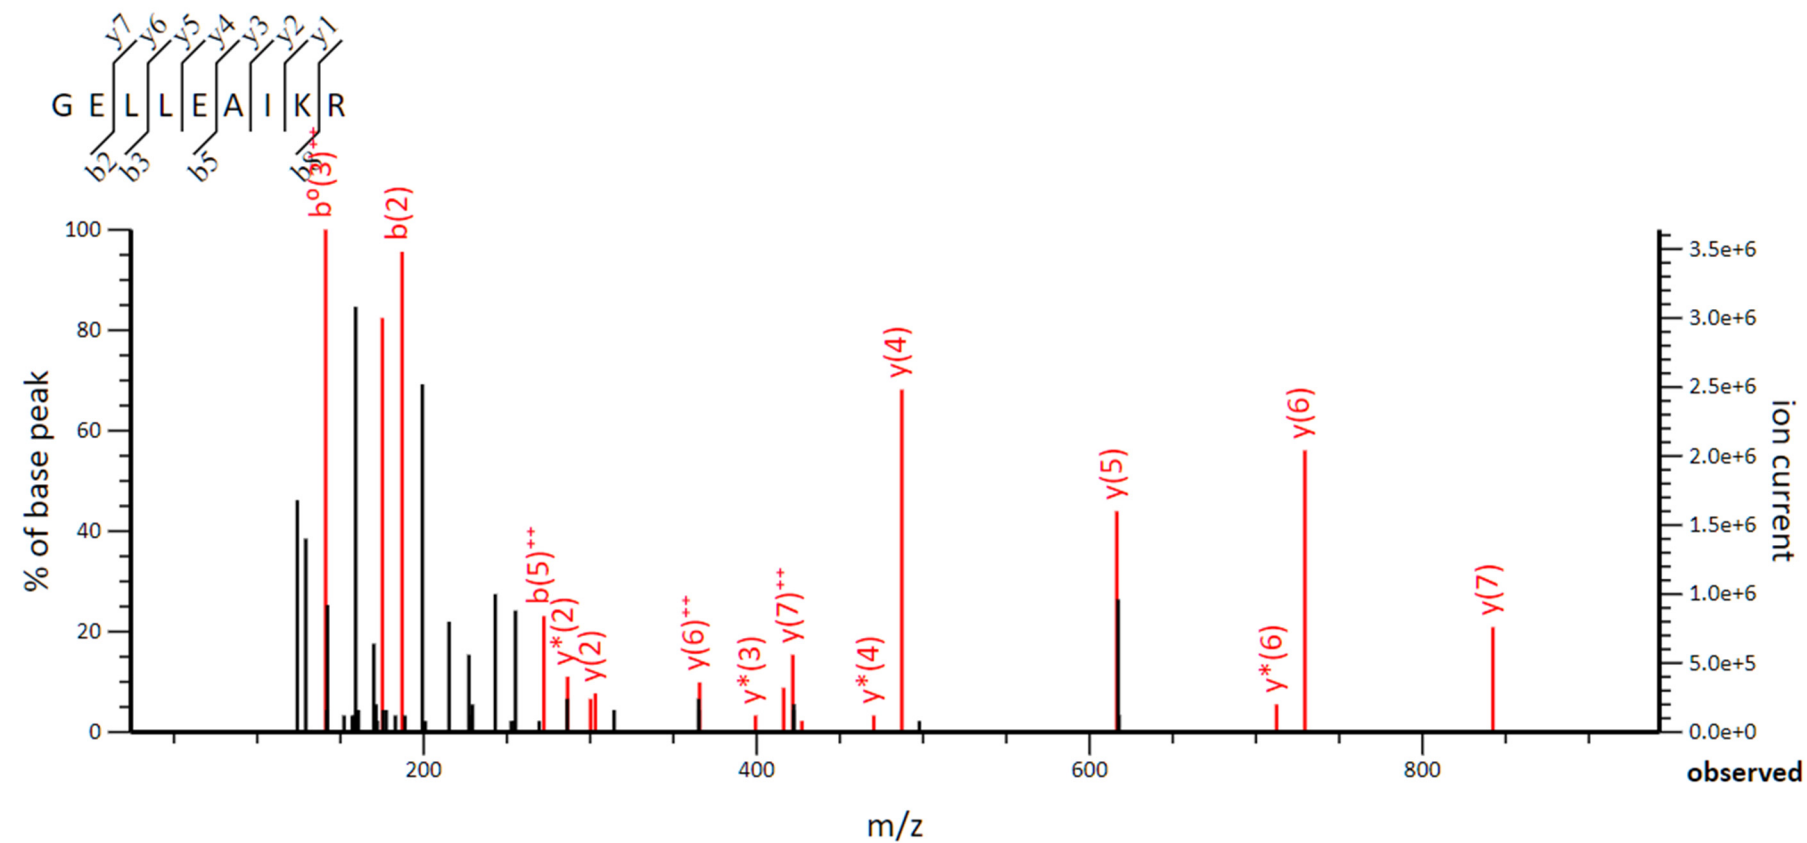

**Monoisotopic mass of neutral peptide Mr(calc):** 1027.6026

**Ions Score:** 51 **Expect:** 0.00055

**Matches :** 20/72 fragment ions using 34 most intense peaks

| # | b        | b <sup>++</sup> | b <sup>*</sup> | b <sup>***</sup> | b <sup>0</sup> | b <sup>0++</sup> | Seq. | y        | y <sup>++</sup> | y <sup>*</sup> | y <sup>***</sup> | y <sup>0</sup> | y <sup>0++</sup> | # |
|---|----------|-----------------|----------------|------------------|----------------|------------------|------|----------|-----------------|----------------|------------------|----------------|------------------|---|
| 1 | 58.0287  | 29.5180         |                |                  |                |                  | G    |          |                 |                |                  |                |                  | 9 |
| 2 | 187.0713 | 94.0393         |                |                  | 169.0608       | 85.0340          | E    | 971.5884 | 486.2978        | 954.5619       | 477.7846         | 953.5778       | 477.2926         | 8 |
| 3 | 300.1554 | 150.5813        |                |                  | 282.1448       | 141.5761         | L    | 842.5458 | 421.7765        | 825.5193       | 413.2633         | 824.5352       | 412.7713         | 7 |
| 4 | 413.2395 | 207.1234        |                |                  | 395.2289       | 198.1181         | L    | 729.4617 | 365.2345        | 712.4352       | 356.7212         | 711.4512       | 356.2292         | 6 |
| 5 | 542.2821 | 271.6447        |                |                  | 524.2715       | 262.6394         | E    | 616.3777 | 308.6925        | 599.3511       | 300.1792         | 598.3671       | 299.6872         | 5 |
| 6 | 613.3192 | 307.1632        |                |                  | 595.3086       | 298.1579         | A    | 487.3351 | 244.1712        | 470.3085       | 235.6579         |                |                  | 4 |
| 7 | 726.4032 | 363.7053        |                |                  | 708.3927       | 354.7000         | I    | 416.2980 | 208.6526        | 399.2714       | 200.1394         |                |                  | 3 |
| 8 | 854.4982 | 427.7527        | 837.4716       | 419.2395         | 836.4876       | 418.7475         | K    | 303.2139 | 152.1106        | 286.1874       | 143.5973         |                |                  | 2 |
| 9 |          |                 |                |                  |                |                  | R    | 175.1190 | 88.0631         | 158.0924       | 79.5498          |                |                  | 1 |

MS/MS Fragmentation of **GDVTTQVALQPALK** found in **SODM**

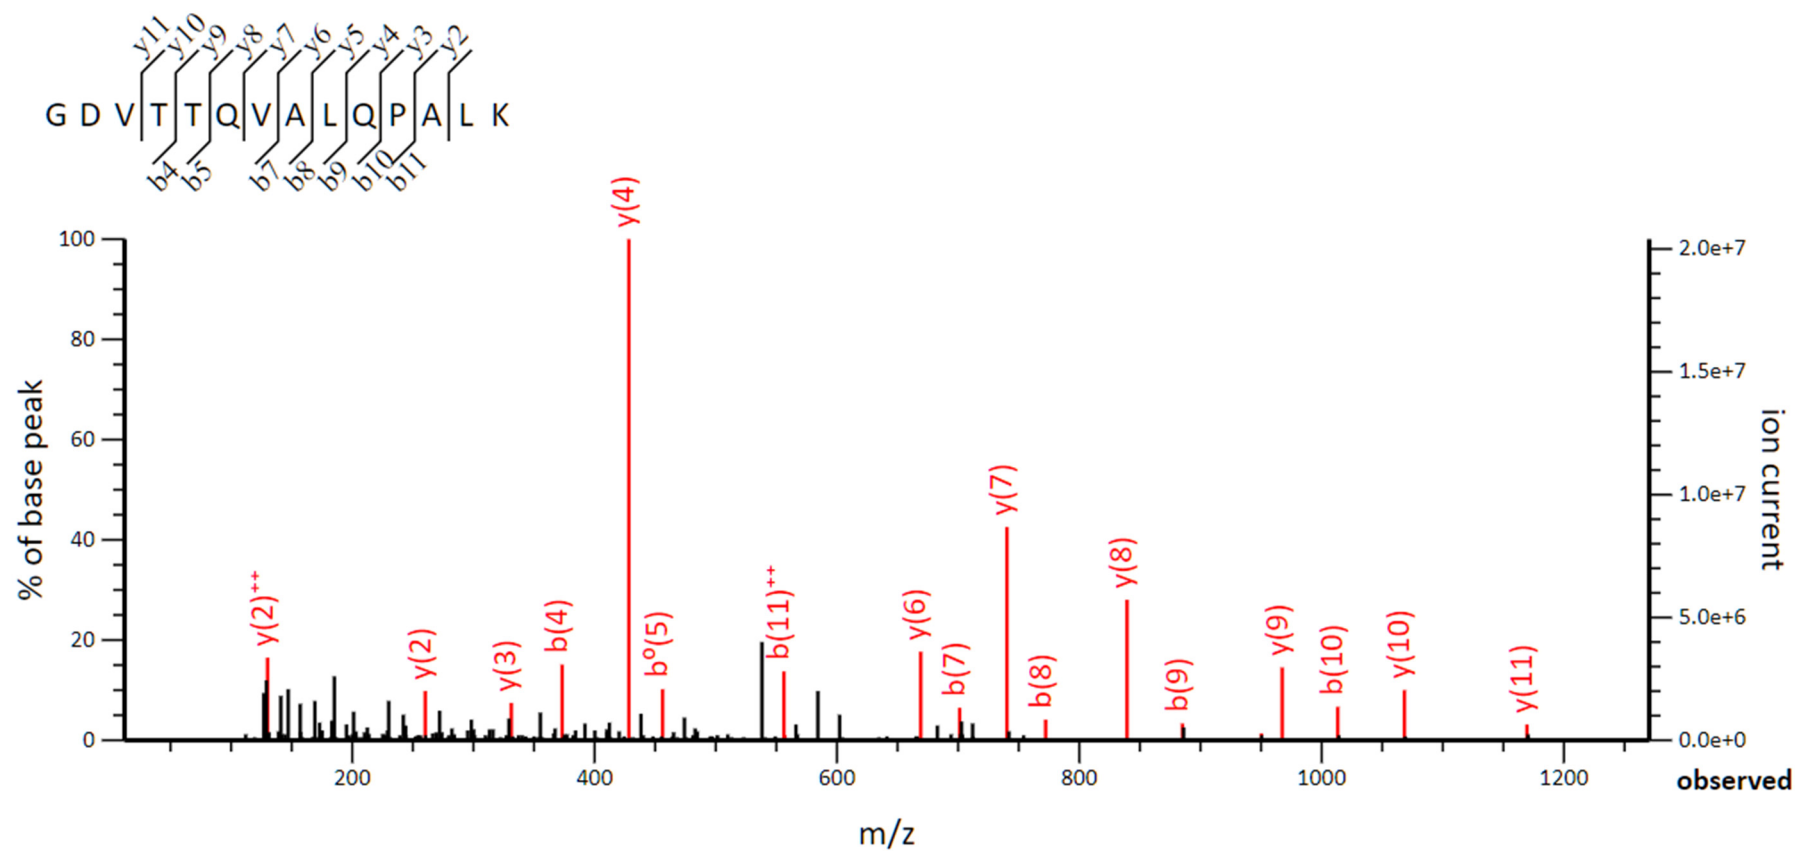

**Monoisotopic mass of neutral peptide Mr(calc):** 1439.7984

**Ions Score:** 93 **Expect:** 4.3e-08

**Matches :** 20/126 fragment ions using 22 most intense peaks

| #  | b         | b <sup>++</sup> | b <sup>*</sup> | b <sup>***</sup> | b <sup>0</sup> | b <sup>0++</sup> | Seq. | y         | y <sup>++</sup> | y <sup>*</sup> | y <sup>***</sup> | y <sup>0</sup> | y <sup>0++</sup> | #  |
|----|-----------|-----------------|----------------|------------------|----------------|------------------|------|-----------|-----------------|----------------|------------------|----------------|------------------|----|
| 1  | 58.0287   | 29.5180         |                |                  |                |                  | G    |           |                 |                |                  |                |                  | 14 |
| 2  | 173.0557  | 87.0315         |                |                  | 155.0451       | 78.0262          | D    | 1383.7842 | 692.3957        | 1366.7577      | 683.8825         | 1365.7736      | 683.3905         | 13 |
| 3  | 272.1241  | 136.5657        |                |                  | 254.1135       | 127.5604         | V    | 1268.7573 | 634.8823        | 1251.7307      | 626.3690         | 1250.7467      | 625.8770         | 12 |
| 4  | 373.1718  | 187.0895        |                |                  | 355.1612       | 178.0842         | T    | 1169.6889 | 585.3481        | 1152.6623      | 576.8348         | 1151.6783      | 576.3428         | 11 |
| 5  | 474.2195  | 237.6134        |                |                  | 456.2089       | 228.6081         | T    | 1068.6412 | 534.8242        | 1051.6146      | 526.3109         | 1050.6306      | 525.8189         | 10 |
| 6  | 602.2780  | 301.6427        | 585.2515       | 293.1294         | 584.2675       | 292.6374         | Q    | 967.5935  | 484.3004        | 950.5669       | 475.7871         |                |                  | 9  |
| 7  | 701.3464  | 351.1769        | 684.3199       | 342.6636         | 683.3359       | 342.1716         | V    | 839.5349  | 420.2711        | 822.5084       | 411.7578         |                |                  | 8  |
| 8  | 772.3836  | 386.6954        | 755.3570       | 378.1821         | 754.3730       | 377.6901         | A    | 740.4665  | 370.7369        | 723.4400       | 362.2236         |                |                  | 7  |
| 9  | 885.4676  | 443.2375        | 868.4411       | 434.7242         | 867.4571       | 434.2322         | L    | 669.4294  | 335.2183        | 652.4028       | 326.7051         |                |                  | 6  |
| 10 | 1013.5262 | 507.2667        | 996.4997       | 498.7535         | 995.5156       | 498.2615         | Q    | 556.3453  | 278.6763        | 539.3188       | 270.1630         |                |                  | 5  |
| 11 | 1110.5790 | 555.7931        | 1093.5524      | 547.2798         | 1092.5684      | 546.7878         | P    | 428.2867  | 214.6470        | 411.2602       | 206.1337         |                |                  | 4  |
| 12 | 1181.6161 | 591.3117        | 1164.5895      | 582.7984         | 1163.6055      | 582.3064         | A    | 331.2340  | 166.1206        | 314.2074       | 157.6074         |                |                  | 3  |
| 13 | 1294.7001 | 647.8537        | 1277.6736      | 639.3404         | 1276.6896      | 638.8484         | L    | 260.1969  | 130.6021        | 243.1703       | 122.0888         |                |                  | 2  |
| 14 |           |                 |                |                  |                |                  | K    | 147.1128  | 74.0600         | 130.0863       | 65.5468          |                |                  | 1  |



MS/MS Fragmentation of **LAVSQVPR** found in **TKT**

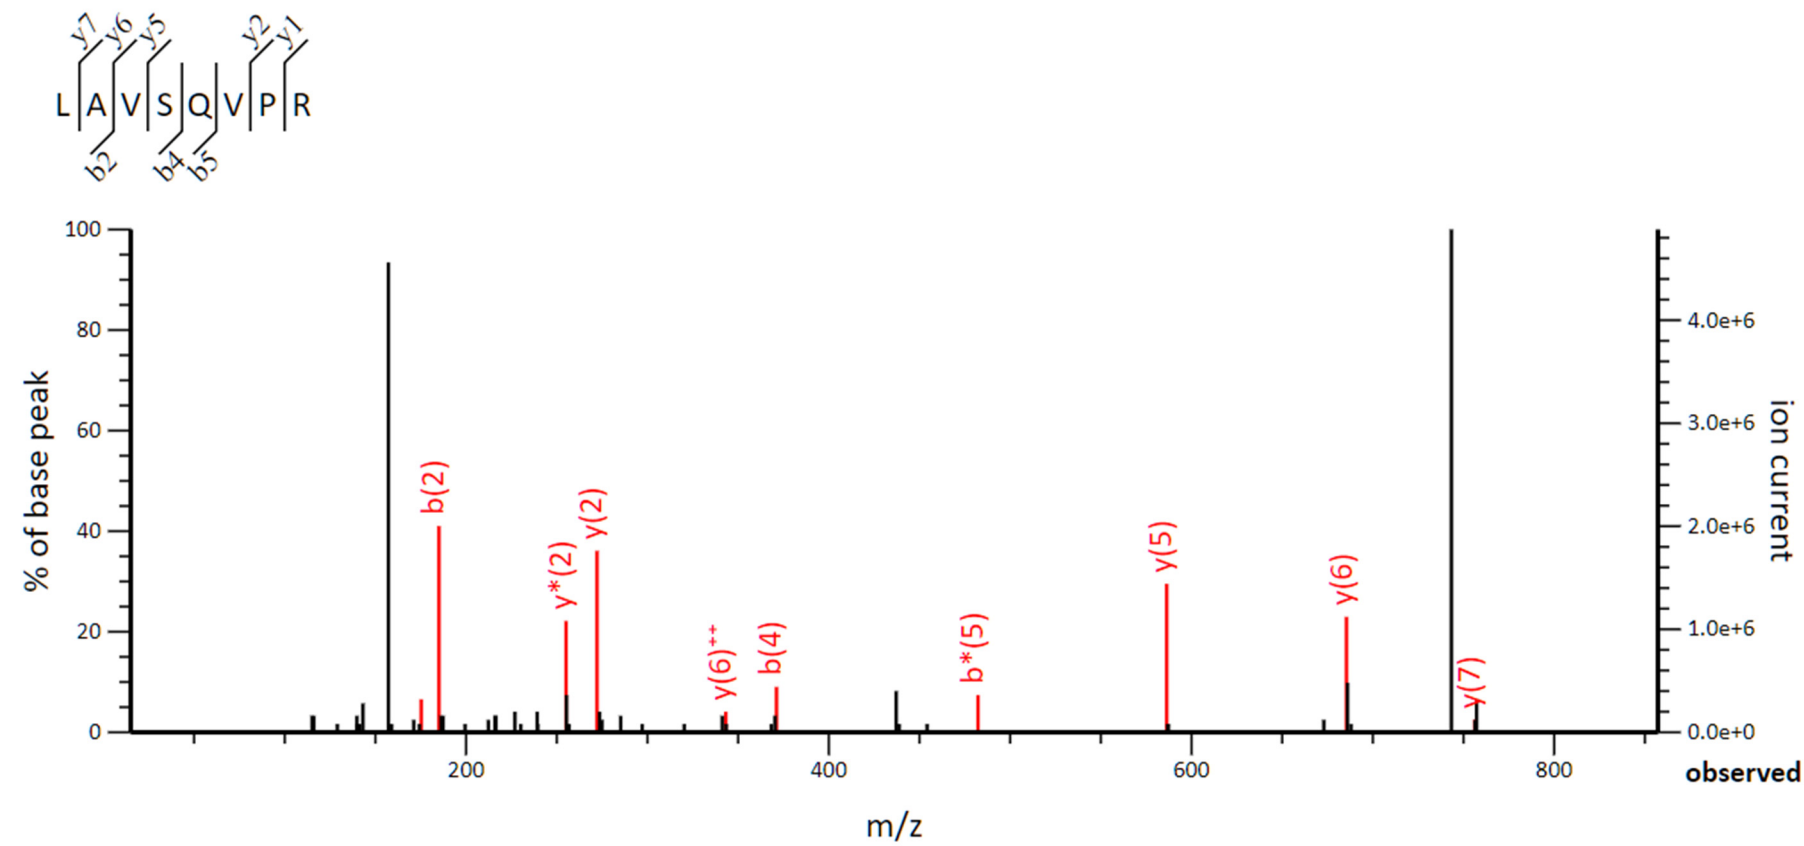

**Monoisotopic mass of neutral peptide Mr(calc):** 868.5130

**Ions Score:** 40 **Expect:** 0.0022

**Matches :** 12/62 fragment ions using 21 most intense peaks

| # | b        | b <sup>++</sup> | b <sup>*</sup> | b <sup>+++</sup> | b <sup>0</sup> | b <sup>0++</sup> | Seq. | y        | y <sup>++</sup> | y <sup>*</sup> | y <sup>+++</sup> | y <sup>0</sup> | y <sup>0++</sup> | # |
|---|----------|-----------------|----------------|------------------|----------------|------------------|------|----------|-----------------|----------------|------------------|----------------|------------------|---|
| 1 | 114.0913 | 57.5493         |                |                  |                |                  | L    |          |                 |                |                  |                |                  | 8 |
| 2 | 185.1285 | 93.0679         |                |                  |                |                  | A    | 756.4363 | 378.7218        | 739.4097       | 370.2085         | 738.4257       | 369.7165         | 7 |
| 3 | 284.1969 | 142.6021        |                |                  |                |                  | V    | 685.3991 | 343.2032        | 668.3726       | 334.6899         | 667.3886       | 334.1979         | 6 |
| 4 | 371.2289 | 186.1181        |                |                  | 353.2183       | 177.1128         | S    | 586.3307 | 293.6690        | 569.3042       | 285.1557         | 568.3202       | 284.6637         | 5 |
| 5 | 499.2875 | 250.1474        | 482.2609       | 241.6341         | 481.2769       | 241.1421         | Q    | 499.2987 | 250.1530        | 482.2722       | 241.6397         |                |                  | 4 |
| 6 | 598.3559 | 299.6816        | 581.3293       | 291.1683         | 580.3453       | 290.6763         | V    | 371.2401 | 186.1237        | 354.2136       | 177.6104         |                |                  | 3 |
| 7 | 695.4087 | 348.2080        | 678.3821       | 339.6947         | 677.3981       | 339.2027         | P    | 272.1717 | 136.5895        | 255.1452       | 128.0762         |                |                  | 2 |
| 8 |          |                 |                |                  |                |                  | R    | 175.1190 | 88.0631         | 158.0924       | 79.5498          |                |                  | 1 |

# MS/MS Fragmentation of **HQPTAIIAK** found in **TKT**

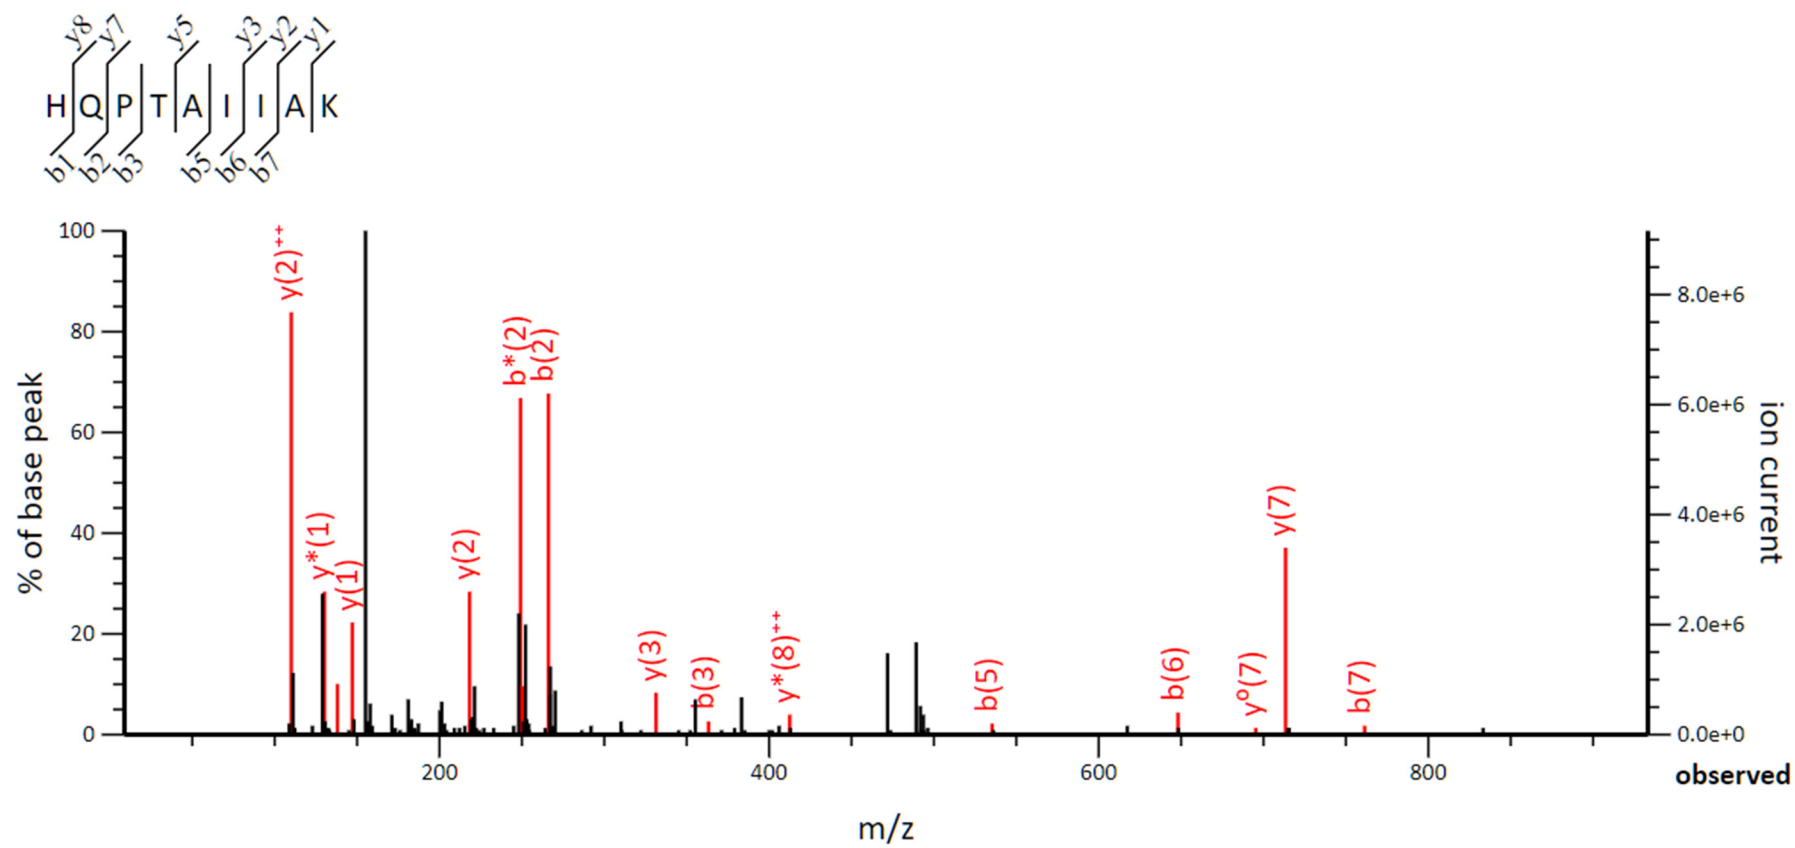

**Monoisotopic mass of neutral peptide Mr(calc):** 977.5658

**Ions Score:** 29 **Expect:** 0.028

**Matches :** 17/78 fragment ions using 40 most intense peaks

| # | b        | b <sup>++</sup> | b <sup>*</sup> | b <sup>***</sup> | b <sup>0</sup> | b <sup>0++</sup> | Seq. | y        | y <sup>++</sup> | y <sup>*</sup> | y <sup>***</sup> | y <sup>0</sup> | y <sup>0++</sup> | # |
|---|----------|-----------------|----------------|------------------|----------------|------------------|------|----------|-----------------|----------------|------------------|----------------|------------------|---|
| 1 | 138.0662 | 69.5367         |                |                  |                |                  | H    |          |                 |                |                  |                |                  | 9 |
| 2 | 266.1248 | 133.5660        | 249.0982       | 125.0527         |                |                  | Q    | 841.5142 | 421.2607        | 824.4876       | 412.7475         | 823.5036       | 412.2554         | 8 |
| 3 | 363.1775 | 182.0924        | 346.1510       | 173.5791         |                |                  | P    | 713.4556 | 357.2314        | 696.4291       | 348.7182         | 695.4450       | 348.2262         | 7 |
| 4 | 464.2252 | 232.6162        | 447.1987       | 224.1030         | 446.2146       | 223.6110         | T    | 616.4028 | 308.7051        | 599.3763       | 300.1918         | 598.3923       | 299.6998         | 6 |
| 5 | 535.2623 | 268.1348        | 518.2358       | 259.6215         | 517.2518       | 259.1295         | A    | 515.3552 | 258.1812        | 498.3286       | 249.6679         |                |                  | 5 |
| 6 | 648.3464 | 324.6768        | 631.3198       | 316.1636         | 630.3358       | 315.6715         | I    | 444.3180 | 222.6627        | 427.2915       | 214.1494         |                |                  | 4 |
| 7 | 761.4305 | 381.2189        | 744.4039       | 372.7056         | 743.4199       | 372.2136         | I    | 331.2340 | 166.1206        | 314.2074       | 157.6074         |                |                  | 3 |
| 8 | 832.4676 | 416.7374        | 815.4410       | 408.2241         | 814.4570       | 407.7321         | A    | 218.1499 | 109.5786        | 201.1234       | 101.0653         |                |                  | 2 |
| 9 |          |                 |                |                  |                |                  | K    | 147.1128 | 74.0600         | 130.0863       | 65.5468          |                |                  | 1 |
